# Supplementary material for: Terminal dysprosium and holmium organoimides
Source: Royal Society of Chemistry journal article supplement (doi:10.1039/d3sc06584g), 2024-01-01
Supplement: d3sc06584g1.pdf [file d3sc06584g1.pdf]

## Supporting Information

### **Terminal Dysprosium and Holmium Organoimides**

Theresa E. Rieser, Dorothea Schädle, Cäcilia Maichle-Mössmer, and Reiner Anwander\*

Institut für Anorganische Chemie, Eberhard Karls Universität Tübingen, Auf der Morgenstelle 18,  
72076 Tübingen, Germany

\*E-mail for R.A.: [reiner.anwander@uni-tuebingen.de](mailto:reiner.anwander@uni-tuebingen.de).

# Table of Contents

|                                                                                                                                                               |     |
|---------------------------------------------------------------------------------------------------------------------------------------------------------------|-----|
| Experimental Section.....                                                                                                                                     | S3  |
| General Considerations .....                                                                                                                                  | S3  |
| General procedure of <b>1-Ln</b> .....                                                                                                                        | S3  |
| Synthesis procedures of <b>1-Ln-10-Ln</b> .....                                                                                                               | S3  |
| Figure S1. Crystal structure of $\text{Ho}(\text{Ga}(\text{CH}_3)_4)_3$ .....                                                                                 | S8  |
| Figure S2. Crystal structure of $\text{Dy}(\text{Ga}(\text{CH}_3)_4)_3$ .....                                                                                 | S8  |
| Figure S3. Crystal structure of <b>1-Ho<sup>Ga</sup></b> .....                                                                                                | S9  |
| Figure S4. Crystal structure of <b>2-Dy</b> .....                                                                                                             | S10 |
| Figure S5. Crystal structure of <b>2-Ho</b> .....                                                                                                             | S11 |
| Figure S6. Crystal structure of <b>3-Ho</b> .....                                                                                                             | S12 |
| Figure S7. Crystal structure of <b>4-Y</b> .....                                                                                                              | S13 |
| Figure S8. Crystal structure of <b>4-Dy</b> .....                                                                                                             | S14 |
| Figure S9. Crystal structure of <b>4-Ho</b> .....                                                                                                             | S15 |
| Figure S10. Crystal structure of <b>5-Dy</b> .....                                                                                                            | S16 |
| Figure S11. Crystal structure of <b>5-Ho</b> .....                                                                                                            | S17 |
| Figure S12. Crystal structure of <b>6-Ho</b> .....                                                                                                            | S18 |
| Figure S13. Crystal structure of <b>7-Dy</b> .....                                                                                                            | S19 |
| Figure S14. Crystal structure of <b>8-Dy</b> .....                                                                                                            | S20 |
| Figure S15. Crystal structure of <b>9-Dy</b> .....                                                                                                            | S21 |
| Tables S1. Crystallographic data for <b>1-Dy, 2-Dy</b> and <b>2-Ho</b> .....                                                                                  | S22 |
| Tables S2. Crystallographic data for <b>4-Y, 4-Dy</b> , and <b>4-Ho</b> .....                                                                                 | S23 |
| Tables S3. Crystallographic data for <b>5-Dy, 5-Ho</b> , and <b>6-Ho</b> .....                                                                                | S24 |
| Tables S4. Crystallographic data for <b>7-Dy, 9-Dy</b> , and <b>3-Ho</b> .....                                                                                | S25 |
| Tables S5. Crystallographic data for <b>8-Ho, Ho</b> [ $\text{Ga}(\text{CH}_3)_4$ ] <sub>3</sub> and $\text{Dy}[\text{Ga}(\text{CH}_3)_4]$ <sub>3</sub> ..... | S26 |
| Crystallography and Crystal Structure Determinations.....                                                                                                     | S27 |
| Figure S16. DRIFT spectrum of <b>4-Dy</b> .....                                                                                                               | S28 |
| Figure S17. DRIFT spectrum of <b>10-Dy</b> .....                                                                                                              | S28 |

|                                                                        |     |
|------------------------------------------------------------------------|-----|
| Figure S18. DRIFT spectrum of $\text{HTp}^{\text{tBu,Me}}$ .....       | S28 |
| NMR Spectroscopy .....                                                 | S29 |
| Figure S19. $^1\text{H}$ NMR spectrum of <b>1-Y<sup>Ga</sup></b> ..... | S29 |
| Figure S20. $^1\text{H}$ NMR spectrum of <b>2-Y</b> .....              | S29 |
| Figure S21. $^1\text{H}$ NMR spectrum of <b>4-Y</b> .....              | S30 |
| References .....                                                       | S31 |

## Experimental Section

**General Considerations.** All manipulations were performed under rigorous exclusion of air and moisture, using standard Schlenk, high-vacuum, and glovebox techniques (MB Braun MB200B; < 0.1 ppm O<sub>2</sub>, < 0.1 ppm H<sub>2</sub>O, argon atmosphere). The solvents *n*-hexane, *n*-pentane, diethyl ether, toluene and tetrahydrofuran (THF) were purified using Grubbs columns (MBraun SPS, solvent purification system). Tetrahydrofuran was stored over freshly activated molecular sieves (3 Å). 2,6-Diisopropylaniline (H<sub>2</sub>NAr<sup>iPr</sup>, 97%, Sigma-Aldrich), 2,6-dimethylaniline (H<sub>2</sub>NAr<sup>Me</sup>, 99%, Sigma-Aldrich), and 2,4,6-trimethylaniline (H<sub>2</sub>NAr<sup>Me3</sup>, 98%, Sigma-Aldrich) were dried over CaH<sub>2</sub> and purified by distillation. 1-Adamantylamine (H<sub>2</sub>NAd, 97%, Sigma-Aldrich) was used without further purification. All solvents and reagents were stored inside a glovebox. C<sub>6</sub>D<sub>6</sub> and toluene-*d*<sub>8</sub> were obtained from *Aldrich* or *eurisotop*, degassed, dried over Na for 24 h and filtered. HTP<sup>tBu,Me</sup> and KTp<sup>tBu,Me</sup> (Tp<sup>tBu,Me</sup> = hydrotris(3-tert-butyl-5-methylpyrazol)borate) were synthesized by a modification of the published procedure of HTP<sup>tBu,Ph</sup>.<sup>1</sup> Ln(AlMe<sub>4</sub>)<sub>3</sub> and Ln(GaMe<sub>4</sub>)<sub>3</sub> (Ln = Y, Dy, Ho) were synthesized according to literature procedures.<sup>2,3</sup> The NMR spectra of air and moisture sensitive compounds were recorded by using *J. Young*-valved NMR tubes on a *Bruker AVII+400* spectrometer (<sup>1</sup>H: 400.13 MHz) and AV500 or *Bruker AVII+500* (5 mm BBO, <sup>1</sup>H: 500.13 Hz; <sup>13</sup>C: 125.77 MHz). <sup>1</sup>H NMR resonances are referenced to solvent residual resonances and reported in *parts per million*, relative to tetramethylsilane (TMS). Coupling constants are given in Hertz. IR spectra were recorded on a *NICOLET 6700 FTIR* spectrometer with a DRIFT cell (KBr window), and the samples were prepared in a glovebox and mixed with KBr powder. Elemental analyses were performed on an *Elementar Vario Micro Cube*.

**General procedure for the synthesis of Tp<sup>tBu,Me</sup>LnMe(GaMe<sub>4</sub>) (1-Ln<sup>Ga</sup>).** To a solution of one equivalent Ln(GaMe<sub>4</sub>)<sub>3</sub> in *n*-pentane (3 mL) a solution of one equivalent HTP<sup>tBu,Me</sup> in *n*-pentane (3 mL) was slowly added. The mixture was stirred for 15 minutes. After formation of a precipitate, the solution was decanted, and the remaining powder was washed with *n*-pentane (3x 5 mL).

**Tp<sup>tBu,Me</sup>YMe(GaMe<sub>4</sub>) (1-Y<sup>Ga</sup>).** Following the procedure described above, Y(GaMe<sub>4</sub>)<sub>3</sub> (100 mg, 0.210 mmol) and HTP<sup>tBu,Me</sup> (89.3 mg, 0.210 mmol) yielded **1-Y<sup>Ga</sup>** as a white precipitate (42 mg, 0.0639 mmol, 30%). <sup>1</sup>H NMR (400 MHz, C<sub>6</sub>D<sub>6</sub>, 26° C): δ 5.60 (s, 3H, pz-*H*), 4.57 (br, 1H, *BH*), 2.01 (s, 9H, pz-*CH*<sub>3</sub>), 1.42 (s, 27H, pz-C(*CH*<sub>3</sub>)<sub>3</sub>) – 0.09 (s, 15H, Y/Ga(*CH*<sub>3</sub>)) ppm. Elemental analysis (%) calculated for BN<sub>6</sub>C<sub>29</sub>H<sub>55</sub>GaY (657.24 g/mol): C 53.00, H 8.44, N 12.79; found: C 53.15, H 8.23, N 12.65.

**Tp<sup>tBu,Me</sup>DyMe(GaMe<sub>4</sub>) (1-Dy<sup>Ga</sup>).** Following the procedure described above, Dy(GaMe<sub>4</sub>)<sub>3</sub> (198 mg, 0.359 mmol) and HTp<sup>tBu,Me</sup> (152 mg, 0.359 mmol) yielded **1-Dy<sup>Ga</sup>** as a yellow precipitate (221 mg, 0.302 mmol, 84%). Single crystals suitable for XRD analysis formed from a toluene solution. Elemental analysis (%) calculated for BN<sub>6</sub>C<sub>29</sub>H<sub>55</sub>GaDy (730.83 g/mol): C 47.66, H 7.59, N 11.50; found: C 47.87, H 7.53, N 11.34.

**Tp<sup>tBu,Me</sup>HoMe(GaMe<sub>4</sub>) (1-Ho<sup>Ga</sup>).** Following the procedure described above, Ho(GaMe<sub>4</sub>)<sub>3</sub> (111 mg, 0.20 mmol) and HTp<sup>tBu,Me</sup> (85 mg, 0.20 mmol) yielded **1-Ho<sup>Ga</sup>** as a pink precipitate (79 mg, 0.108 mmol, 39%). <sup>1</sup>H NMR (500 MHz, toluene-*d*<sub>8</sub>, 26 °C): δ 101.83, 50.92, -8.78, -15.58, -152.38, -177.58 ppm. DRIFT (KBr): 2964 s, 2906 s, 2877 m, 2806 ww, 2564 w (B-H), 1539 vs, 1489 w, 1473 m, 1464 m, 1431 vs, 1382 w, 1365 m, 1351 s, 1326 m, 1240 w, 1202 m, 1191 m, 1165 vs, 1141 m, 1065 s, 1027 m, 799 s, 763 s, 731 w, 682 s, 643 m, 584 w, 524 m, 471 w, 411 m cm<sup>-1</sup>. Elemental analysis calcd (%) for C<sub>29</sub>H<sub>55</sub>BGaHoN<sub>6</sub>: C 47.50, H 7.56, N 11.46; found: C 47.32, H 7.92, N 11.21.

**General procedure for the synthesis of Tp<sup>tBu,Me</sup>LnMe(HNC<sub>6</sub>H<sub>3</sub>iPr<sub>2</sub>-2,6) (2-Ln).** To a solution of one equivalent **1-Ln** in toluene (3 mL) a solution of one equivalent H<sub>2</sub>NC<sub>6</sub>H<sub>3</sub>iPr<sub>2</sub>-2,6 in toluene (3 mL) was slowly added. The mixture was stirred for one hour at ambient temperature. After the solvent was removed under vacuum, the powder was washed with *n*-hexane (3x 5 mL).

**Tp<sup>tBu,Me</sup>YMe(HNC<sub>6</sub>H<sub>3</sub>iPr<sub>2</sub>-2,6) (2-Y).** Following the procedure described above, **1-Y** (563 mg, 0.857 mmol) and H<sub>2</sub>NC<sub>6</sub>H<sub>3</sub>iPr<sub>2</sub>-2,6 (152 mg, 0.857 mmol) yielded **2-Y** as a white precipitate (467 mg, 0.664 mmol, 77%). <sup>1</sup>H NMR (400 MHz, C<sub>6</sub>D<sub>6</sub>, 26 °C): δ 7.08 (d, 2H, <sup>3</sup>J<sub>HH</sub> 7.52 Hz, *m*-ArH), 6.77 (t, 1H, <sup>3</sup>J<sub>HH</sub> 7.36 Hz, *p*-ArH), 5.56 (s, 3H, *pz*-H), 4.87 (s, 1H, NH), 2.87 (br, 2H, *i*Pr-H), 2.13 (s, 9H, *pz*-CH<sub>3</sub>), 1.39 (s, 27H, *pz*-C(CH<sub>3</sub>)<sub>3</sub>), 1.13 (d, 12H, <sup>3</sup>J<sub>HH</sub> 6.43 Hz, *i*Pr-CH<sub>3</sub>), 0.46 (d, 3H, <sup>2</sup>J<sub>YH</sub> 1.74 Hz, Y-CH<sub>3</sub>) ppm. Elemental analysis (%) calculated for BN<sub>7</sub>C<sub>37</sub>H<sub>61</sub>Y (703.66 g/mol): C 63.16, H 8.74, N 13.93; found: C 63.35, H 8.58, N 13.72.

**Tp<sup>tBu,Me</sup>DyMe(HNC<sub>6</sub>H<sub>3</sub>iPr<sub>2</sub>-2,6) (2-Dy).** Following the procedure described above, **1-Dy** (70 mg, 0.0958 mmol) and H<sub>2</sub>NC<sub>6</sub>H<sub>3</sub>iPr<sub>2</sub>-2,6 (15.3 mg, 0.0862 mmol) yielded **2-Dy** as a yellow precipitate (63 mg, 0.0811 mmol, 85%). Single crystals suitable for XRD analysis formed from a toluene solution. Elemental analysis (%) calculated for BN<sub>7</sub>C<sub>37</sub>H<sub>61</sub>Dy (777.25 g/mol): C 57.18, H 7.91, N 12.61; found: C 57.30, 7.77, N 12.40.

**Tp<sup>tBu,Me</sup>HoMe(HNC<sub>6</sub>H<sub>3</sub>iPr<sub>2</sub>-2,6) (2-Ho).** Following the procedure described above, **1-Ho** (100 mg, 0.136 mmol) and H<sub>2</sub>NC<sub>6</sub>H<sub>3</sub>iPr<sub>2</sub>-2,6 (21.8 mg, 0.123 mmol) yielded **2-Ho** as a yellow precipitate (87 mg, 0.112 mmol, 82%). Single crystals suitable for XRD analysis formed from a toluene solution. Elemental analysis (%) calculated for BN<sub>7</sub>C<sub>37</sub>H<sub>61</sub>Ho (779.68 g/mol): C 57.00, H 7.89, N 12.58; found: C 57.28, H 6.87, N 12.44.

**Tp<sup>tBu,Me</sup>Ho(HNC<sub>10</sub>H<sub>15</sub>)<sub>2</sub> (3-Ho).** To a solution of **1-Ho** (30.0 mg, 0.0409 mmol) in toluene (2 mL) a solution of H<sub>2</sub>NC<sub>10</sub>H<sub>15</sub> (5.57 mg, 0.0368 mmol) in toluene (3 mL) was added and stirred for 15 minutes at – 35 °C. After the solvent was removed under vacuum and the powder was washed with *n*-hexane (3x 5 mL), single crystals suitable for XRD analysis formed from a toluene solution. Elemental analysis (%) calculated for BN<sub>8</sub>C<sub>44</sub>H<sub>72</sub>Ho (888.86 g/mol): C 59.46, H 8.17, N 12.61; found: C 59.28 H 8.09, N 12.54.

**General procedure for the synthesis of Tp<sup>tBu,Me</sup>Ln(NC<sub>6</sub>H<sub>3</sub>iPr<sub>2</sub>-2,6)(dmap) (4-Ln).** To a solution of one equivalent **2-Ln** in toluene (3 mL) a solution of one equivalent DMAP in toluene (3 mL) was slowly added. The mixture was stirred for one hour at ambient temperature. After the solvent was removed under vacuum, the powder was washed with *n*-hexane (3x 5 mL).

**Tp<sup>tBu,Me</sup>Y(NC<sub>6</sub>H<sub>3</sub>iPr<sub>2</sub>-2,6)(dmap) (4-Y).** Following the procedure described above, **2-Y** (330 mg, 0.469 mmol) and DMAP (57.3 mg, 0.469 mmol) yielded **4-Y** as a beige precipitate (279 mg, 0.345 mmol, 74%). Single crystals suitable for XRD analysis formed from a toluene solution. <sup>1</sup>H NMR (400 MHz, C<sub>6</sub>D<sub>6</sub>, 26 °C): δ 8.47 (d, 1H, <sup>3</sup>J<sub>HH</sub> 6.30 Hz, DMAP, *H*<sub>ortho</sub>), 8.01 (s br, 1H, DMAP, *H*<sub>ortho</sub>), 7.04 (d, 2H, <sup>3</sup>J<sub>HH</sub> 7.42 Hz, *m*-ArH), 6.71 (t, 1H, <sup>3</sup>J<sub>HH</sub> 7.27 Hz, *p*-ArH), 6.35 (dd, 1H, <sup>3</sup>J<sub>HH</sub> 6.28 Hz, <sup>4</sup>J<sub>HH</sub> 2.71 Hz, DMAP, *H*<sub>meta</sub>), 5.72 (s, 3H, *pz*-H), 5.53 (s br, 1 H, DMAP, *H*<sub>meta</sub>), 2.79 (br, 2H, *iPr*-H), 2.51 (s, 6H, N(CH<sub>3</sub>)<sub>2</sub>) 2.24 (s, 9H, *pz*-CH<sub>3</sub>), 1.39 (s, 27H, *pz*-C(CH<sub>3</sub>)<sub>3</sub>), 0.99 (d, 12H, <sup>3</sup>J<sub>HH</sub> 6.93 Hz, *iPr*-CH<sub>3</sub>) ppm. Elemental analysis (%) calculated for BN<sub>9</sub>C<sub>43</sub>H<sub>67</sub>Y (809.79 g/mol): C 63.78, H 8.34, N 15.57; found: C 64.35, H 8.95, N 14.58.

**Tp<sup>tBu,Me</sup>Dy(NC<sub>6</sub>H<sub>3</sub>iPr<sub>2</sub>-2,6)(dmap) (4-Dy).** Following the procedure described above, **2-Dy** (321 mg, 0.413 mmol) and DMAP (50.5 mg, 0.413 mmol) yielded **4-Dy** as a yellow precipitate (109 mg, 0.123 mmol, 30%). Single crystals suitable for XRD analysis formed from a toluene solution.  $\tilde{\nu}_{\max}$  = 3056 vw, 3023 vw, 2960 vs, 2930 s, 2862 m, 2557 (B-H), 1612 vs, 1582 vs, 1542 vs, 1489 w, 1463 m, 1427 vs, 1399 s, 1351 s, 1329 vs, 1267 s, 1230 m, 1199 m, 1179 s, 1138 w, 1065 s, 1006 s, 990 m, 906 m, 848 w, 802 m, 790 m, 770 m, 739 m, 683 w, 645 m, 541 vw, 515 vw, 441 vw, 415 vw cm<sup>-1</sup>. Elemental analysis (%) calculated for BN<sub>9</sub>C<sub>43</sub>H<sub>67</sub>Dy (883.38 g/mol): C 58.47, H 7.65, N 14.27; found: C 60.04, 7.54, N 13.49.

**Tp<sup>tBu,Me</sup>Ho(NC<sub>6</sub>H<sub>3</sub>iPr<sub>2</sub>-2,6)(dmap) (4-Ho).** Following the procedure described above, **2-Ho** (177 mg, 0.227 mmol) and DMAP (27.7 mg, 0.227 mmol) yielded **4-Ho** as an orange precipitate (78.3 mg, 0.0884 mmol, 39%). Single crystals suitable for XRD analysis formed from a toluene solution. Elemental analysis (%) calculated for BN<sub>9</sub>C<sub>43</sub>H<sub>67</sub>Ho (885.81 g/mol): C 58.31, H 7.62, N 14.23; found: C 58.04, H 7.61, N 13.79.

**General procedure for the synthesis of Tp<sup>tBu,Me</sup>Ln(NC<sub>6</sub>H<sub>3</sub>iPr<sub>2</sub>-2,6)(AlMe<sub>3</sub>) (5-Ln).** To a solution of Tp<sup>tBu,Me</sup>DyMe(AlMe<sub>4</sub>) (**1-Ln<sup>Al</sup>**) in toluene (3 mL) a solution of an equimolar amount of H<sub>2</sub>NC<sub>6</sub>H<sub>3</sub>Me<sub>2</sub>-2,6 in toluene (3 mL) was slowly added. The mixture was stirred for one hour at ambient temperature. After the solvent was removed under vacuum, the powder was washed with *n*-hexane (3x 5 mL).

**Tp<sup>tBu,Me</sup>Dy(NC<sub>6</sub>H<sub>3</sub>Me<sub>2</sub>-2,6)(AlMe<sub>3</sub>) (5-Dy).** Following the procedure described above, Tp<sup>tBu,Me</sup>DyMe(AlMe<sub>4</sub>) (**1-Dy<sup>Al</sup>**, 80.3 mg, 0.0964 mmol) and H<sub>2</sub>NC<sub>6</sub>H<sub>3</sub>Me<sub>2</sub>-2,6 (11.7 mg, 0.0964 mmol) yielded **5-Dy** as a yellow precipitate (27.8 mg, 0.0358 mmol, 37%). Single crystals suitable for XRD analysis formed from a toluene solution.

**Tp<sup>tBu,Me</sup>Ho(NC<sub>6</sub>H<sub>3</sub>Me<sub>2</sub>-2,6)(AlMe<sub>3</sub>) (5-Ho).** Following the procedure described above, **1-Ho<sup>Al</sup>** (121 mg, 0.155 mmol) and H<sub>2</sub>NC<sub>6</sub>H<sub>3</sub>Me<sub>2</sub>-2,6 (18.8 mg, 0.155 mmol) yielded **5-Ho** as a yellow precipitate (37.5 mg, 0.0481 mmol, 31%). Single crystals suitable for XRD analysis formed from a toluene solution. Elemental analysis (%) calculated for BN<sub>7</sub>C<sub>35</sub>H<sub>58</sub>HoAl (779.62 g/mol): C 53.92, H 7.50, N 12.58; found: C 54.04, H 7.60, N 12.04.

**Tp<sup>tBu,Me</sup>Ho(NC<sub>6</sub>H<sub>2</sub>Me<sub>3</sub>-2,4,6)(AlMe<sub>3</sub>) (6-Ho).** To a solution of Tp<sup>tBu,Me</sup>HoMe(AlMe<sub>4</sub>) (**1-Ho<sup>Al</sup>**) (100 mg, 0.136 mmol) in toluene (4 mL) a solution of H<sub>2</sub>NC<sub>6</sub>H<sub>3</sub>Me<sub>3</sub>-2,4,6 (16.5 mg, 0.122 mmol) in toluene (3 mL) was added and stirred for 1 h at ambient temperature. After the solvent was removed under vacuum and the powder was washed with *n*-hexane (3x 5 mL), single crystals suitable for XRD analysis formed from a toluene solution.

**Tp<sup>tBu,Me</sup>Dy(HNC<sub>6</sub>H<sub>3</sub>iPr<sub>2</sub>-2,6)(NC(CH<sub>3</sub>)<sub>2</sub>) (7-Dy).** To a solution of **2-Dy** (200 mg, 0.257 mmol) in toluene (6 mL) acetonitrile (21 mg, 0.512 mmol) was added. The solution was stirred at ambient temperature overnight. After the solvent was removed under vacuum and the yellow powder was washed with *n*-hexane (3x 5 mL), single crystals suitable for XRD analysis formed from a toluene solution.

**Tp<sup>tBu,Me</sup>Dy(NC<sub>6</sub>H<sub>3</sub>iPr<sub>2</sub>-2,6)(thf) (8-Dy).** To a solution of **4-Dy** (183 mg, 0.207 mmol) in toluene (3 mL) a solution of 9-BBN (50.6 mg, 0.207 mmol) in THF (3 mL) was added and

stirred for 3 h at ambient temperature. Yellow, single crystals suitable for XRD analysis formed from a toluene solution (36.7 mg, 0.044 mmol, 21%). Elemental analysis (%) calculated for  $\text{BN}_7\text{C}_{40}\text{H}_{65}\text{DyO}$  (833.32 g/mol): C 57.65, H 7.86, N 11.77; found: C 57.39, H 7.67, N 12.14.

**$\text{Tp}^{\text{tBu,Me}}\text{Dy}(\mu_2\text{-CH}_2)(\mu_2\text{-HBC}_8\text{H}_{14})(\text{HNC}_6\text{H}_3i\text{Pr}_2\text{-2,6})$  (9-Dy).** To a solution of **3-Dy** (150 mg, 0.170 mmol) in toluene (10 mL) a solution of 9-BBN (124 mg, 0.510 mmol) in toluene (5 mL) was added. The reaction mixture was stirred for 1 h at 40° C. Single crystals suitable for XRD analysis formed from a toluene solution.

**$\text{Tp}^{\text{tBu,Me}}\text{Dy}(\text{CO}_2)_2(\text{NC}_6\text{H}_3i\text{Pr}_2\text{-2,6})$  (10-Dy).** A solution of **4-Dy** (82.2 mg, 0.0931 mmol) in toluene (2 mL) under 1 bar  $\text{CO}_2$  pressure was stirred for 30 minutes. After the color changed from yellow to colorless the solvent was removed under vacuum and the powder was washed with *n*-hexane (3x 5 mL) (44.6 mg, 0.0527 mmol, 57%). Elemental analysis (%) calculated for  $\text{BN}_7\text{C}_{38}\text{H}_{57}\text{DyO}_4$  (849.23 g/mol): C 53.74, H 6.77, N 11.55; found: C 54.63 H 6.92, N 11.54.



## Crystallography

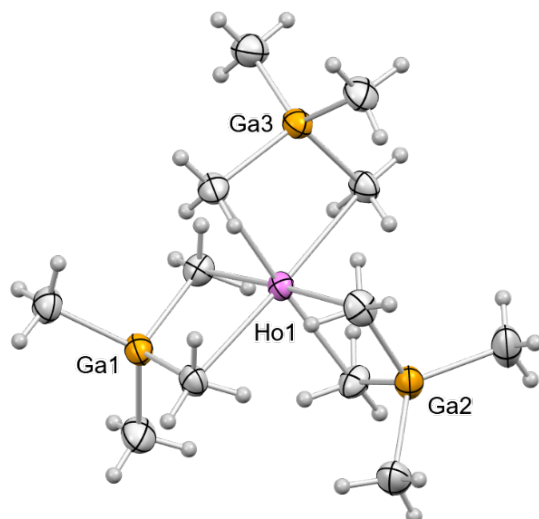

**Figure S1.** Crystal structure of  $\text{Ho}(\text{Ga}(\text{CH}_3)_4)_3$ . Atomic displacement ellipsoids were set at 50% probability. Selected interatomic distances [ $\text{\AA}$ ] and angles [ $^\circ$ ]: Ho1–C1 2.508(5), Ho1–C6 2.519(5), Ho1–C5 2.516(5), Ho1–C2 2.521(5), Ho1–C10 2.523(5), Ho1–C9 2.534(5), Ga1–C3 1.978(6), Ga1–C4 1.981(5), Ga1–C2 2.108(5), Ga1–C1 2.108(5); C1–Ho1–C6 90.60(17), C1–Ho1–C5 90.64(17), C1–Ho1–C2 86.84(16), C6–Ho1–C2 91.98(16), C1–Ho1–C10 177.28(17).

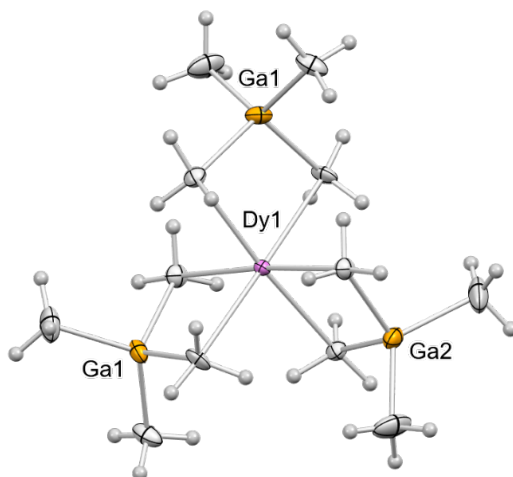

**Figure S2.** Crystal structure of  $\text{Dy}(\text{Ga}(\text{CH}_3)_4)_3$ . Atomic displacement ellipsoids were set at 50% probability. Selected interatomic distances [ $\text{\AA}$ ] and angles [ $^\circ$ ]: Ga1–C1 2.113(3), Dy1–C1 2.526(2), Ga1–C2 2.109(3), Dy1–C2 2.521(2), Ga1–C3 1.973(3), Dy1–C5 2.511(2), Ga2–C5 2.118(2), Dy1–C5' 2.511(2), Dy1–C2' 2.521(2), Dy1–C1' 2.527(2); C5–Dy1–C5' 87.06(11), C5–Dy1–C2 91.56(8), C5'–Dy1–C2 89.19(8), C2–Dy1–C2' 178.97(12), C5–Dy1–C1 91.53(9), C5–Dy1–C1' 175.30(8), C2–Dy1–C1 86.36(8), C2'–Dy1–C1 92.91(9), C5–Dy1–C1' 175.30(8), C5'–Dy1–C1' 91.54(9), C2–Dy1–C1' 92.91(9), C2'–Dy1–C1' 86.36(8), C1–Dy1–C1' 90.21(12).

<sup>c</sup> -x+1, y, -z+1/2

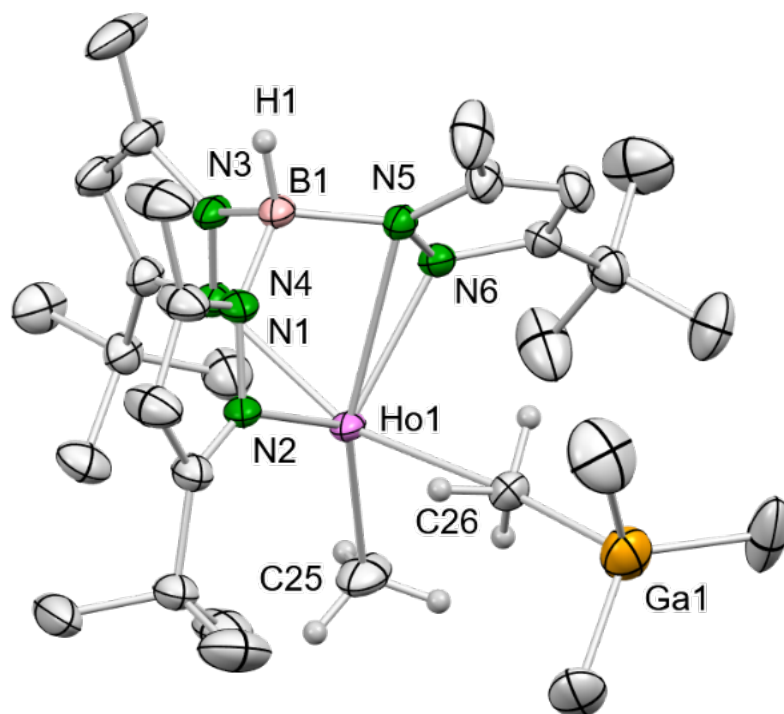

**Figure S3.** Crystal structure of **1-Ho<sup>Ga</sup>**. Atomic displacement ellipsoids were set at 50% probability. Hydrogen atoms except for the B–H and H–C25/26, and the disorder of one *tert*-butyl group are omitted for clarity. Selected interatomic distances [Å] and angles [°]: Ho1–N2 2.362(3), Ho1–N4 2.376(3), Ho1–N6 2.334(3), Ho1–C25 2.356(5), Ho1–C26 2.652(4); N2–Ho1–N4 77.82(12), N2–Ho1–N6 102.08(12), N2–Ho1–C25 128.40(19), N2–Ho1–C26 87.39(13), N4–Ho1–N6 75.50(12), N4–Ho1–C25 113.76(17), N4–Ho1–C26 152.60(12), N6–Ho1–C25 129.46(19), N6–Ho1–C26 85.41(13), C25–Ho1–C26 93.53(17), Ho1–C26–Ga1 174.9(2).

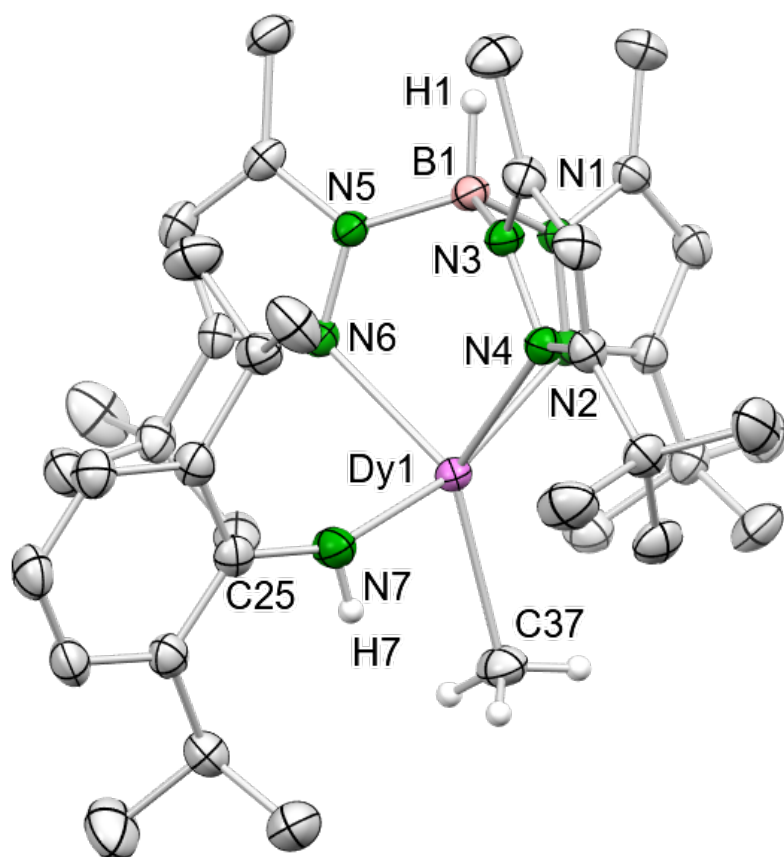

**Figure S4.** Crystal structure of **2-Dy**. Atomic displacement ellipsoids were set at 50% probability. Hydrogen atoms except for the B–H, the N–H and the H–C37, and the disorder of one *tert*-butyl group are omitted for clarity. Selected interatomic distances [Å] and angles [°]: Dy1–N2 2.5163(18), Dy1–N4 2.3752(17), Dy1–N6 2.4108(17), Dy1–N7 2.212(2), Dy1–C37 2.436(2); N2–Dy1–N4 74.52(6), N2–Dy1–N6 75.11(6), N2–Dy1–N7 166.20(7), N2–Dy1–C37 107.08(7), N4–Dy1–N6 94.33(6), N4–Dy1–N7 98.15(7), N4–Dy1–C37 130.41(8), N6–Dy1–N7 94.13(7), N6–Dy1–C37 134.76(8), N7–Dy1–C37 86.61(8), Dy1–N7–C25 155.84(16).

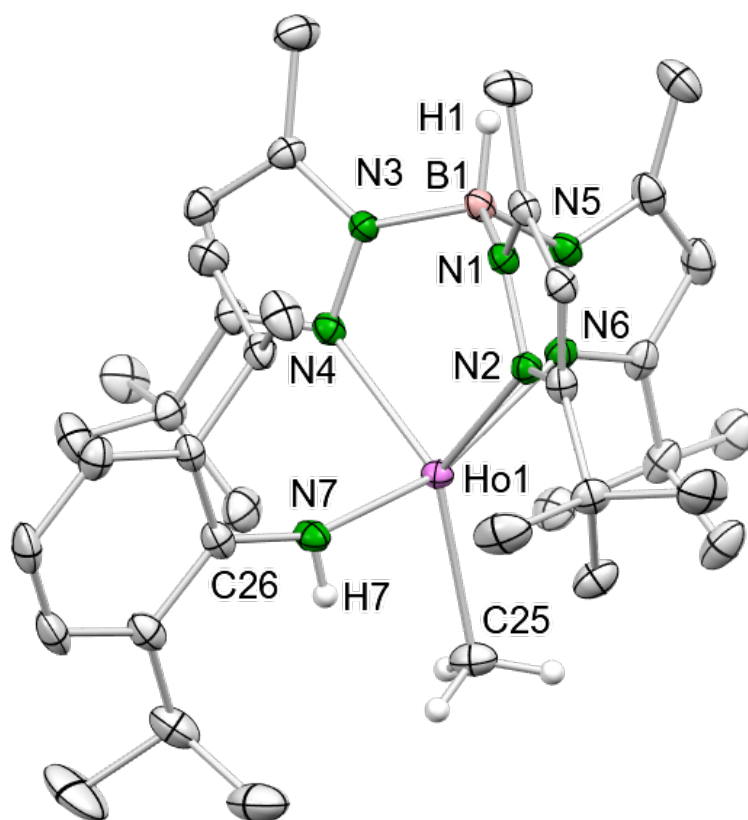

**Figure S5.** Crystal structure of **2-Ho**. Atomic displacement ellipsoids were set at 50% probability. Hydrogen atoms except for the B–H, the N–H and the H–C37, and one additional toluene molecule are omitted for clarity. Selected interatomic distances [Å] and angles [°]: Ho1–N2 2.373(2), Ho1–N4 2.369(2), Ho1–N6 2.536(2), Ho1–N7 2.222(2), Ho1–C25 2.427(3); N2–Ho1–N4 94.66(8), N2–Ho1–N6 77.23(7), N2–Ho1–N7 94.00(8), N2–Ho1–C25 129.46(9), N4–Ho1–N6 73.22(7), N4–Ho1–N7 94.60(8), N4–Ho1–C25 135.29(9), N6–Ho1–N7 164.08(8), N6–Ho1–C25 106.18(9), N7–Ho1–C25 89.66(9), Ho1–N7–C26 160.28(19).

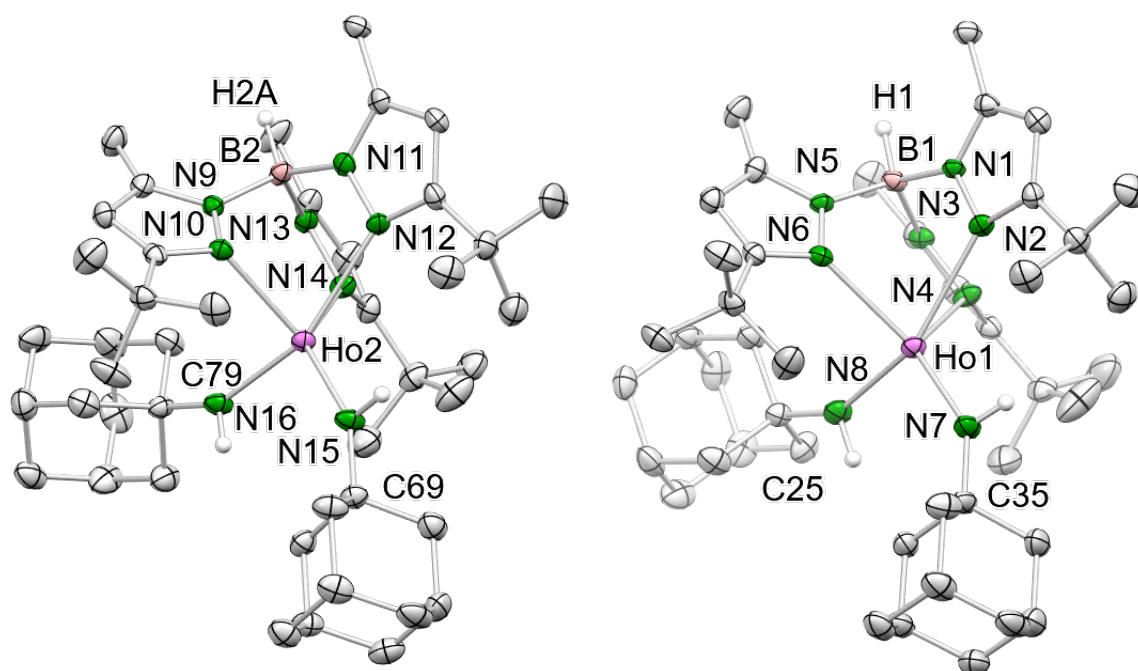

**Figure S6.** Crystal structure of **3-Ho**. Atomic displacement ellipsoids were set at 50% probability. Hydrogen atoms except for the B–H, the N–H, and lattice solvent (two molecules of THF) are omitted for clarity. The unit cell contains two independent molecules with different parameters. Selected interatomic distances [Å] and angles [°]: Ho1–N2 2.610(3), Ho1–N4 2.406(3), Ho1–N6 2.417(3), Ho1–N7 2.172(3), Ho1–N8 2.170(3), Ho2–N10 2.393(3), Ho2–N12 2.586(3), Ho2–N14 2.410(3), Ho2–N15 2.163(3), Ho2–N16 2.167(3); N2–Ho1–N4 69.77(10), N2–Ho1–N6 72.87(10), N2–Ho1–N7 103.30(12), N2–Ho1–N8 152.73(11), N4–Ho1–N6 100.02(10), N4–Ho1–N7 124.13(13), N4–Ho1–N8 91.54(12), N6–Ho1–N7 131.97(13), N6–Ho1–N8 91.94(12), N7–Ho1–N8 103.66(13), Ho1–N7–C35 144.0(3), Ho1–N8–C25 148.5(3), N10–Ho2–N12 71.81(10), N10–Ho2–N14 101.06(10), N10–Ho2–N15 119.74(12), N10–Ho2–N16 94.22(12), N12–Ho2–N14 70.46(11), N12–Ho2–N15 102.99(12), N12–Ho2–N16 154.81(11), N14–Ho2–N15 134.82(12), N14–Ho2–N16 92.71(12), N15–Ho2–N16 102.15(13), Ho2–N15–C69 146.9(3), Ho2–N16–C79 148.1(3).

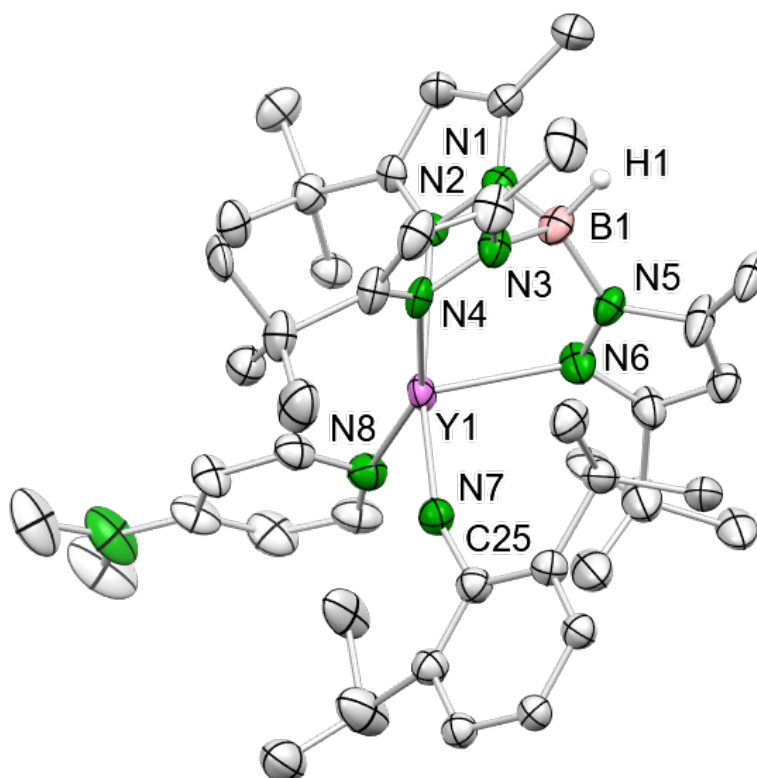

**Figure S7.** Crystal structure of **4-Y**. Atomic displacement ellipsoids were set at 50% probability. Hydrogen atoms except for the B–H, and three additional THF molecules as well as the disorder in two *tert*-butyl groups, one methyl group, and in the aryl group are omitted for clarity. Selected interatomic distances [Å] and angles [°]: Y1–N2 2.561(13), Y1–N4 2.457(14), Y1–N6 2.425(14), Y1–N7 2.26(3), Y1–N8 2.347(14); N2–Y1–N4 73.4(4), N2–Y1–N6 72.9(5), N2–Y1–N7 161.7(7), N2–Y1–N8 104.1(5), N4–Y1–N6 96.1(5), N4–Y1–N7 92.3(9), N4–Y1–N8 158.7(5), N6–Y1–N7 99.7(9), N6–Y1–N8 103.4(5), N7–Y1–N8 93.9(8), Y1–N7–C25 158(2).

\* only connectivity, bond lengths and angles are not reliable

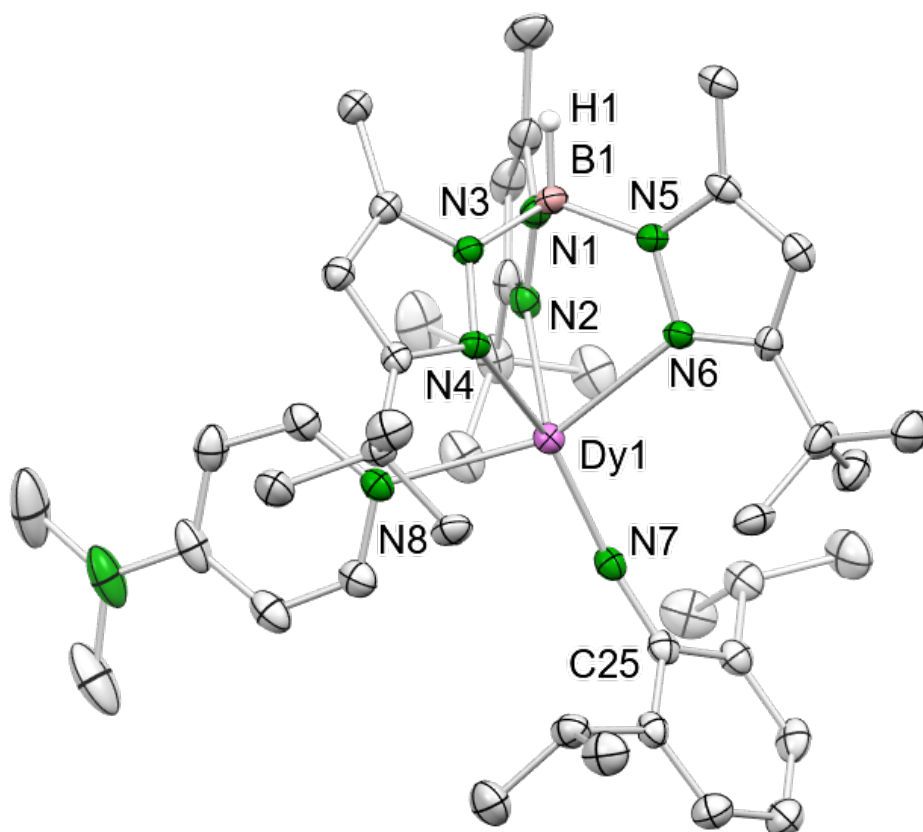

**Figure S8.** Crystal structure of **4-Dy**. Hydrogen atoms except for the B–H, and one additional toluene molecule are omitted for clarity. Atomic displacement ellipsoids were set at 50% probability. Selected interatomic distances [Å] and angles [°]: Dy1–N2 2.452(3), Dy1–N4 2.517(3), Dy1–N6 2.450(3), Dy1–N7 2.017(3), Dy1–N8 2.450(3); N2–Dy1–N4 92.37(9), N2–Dy1–N6 83.43(9), N2–Dy1–N7 120.04(10), N2–Dy1–N8 90.02(9), N4–Dy1–N6 73.88(9), N4–Dy1–N7 147.59(10), N4–Dy1–N8 80.27(9), N6–Dy1–N7 107.81(10), N6–Dy1–N8 152.99(9), N7–Dy1–N8 98.18(10), Dy1–N7–C25 166.0(2).

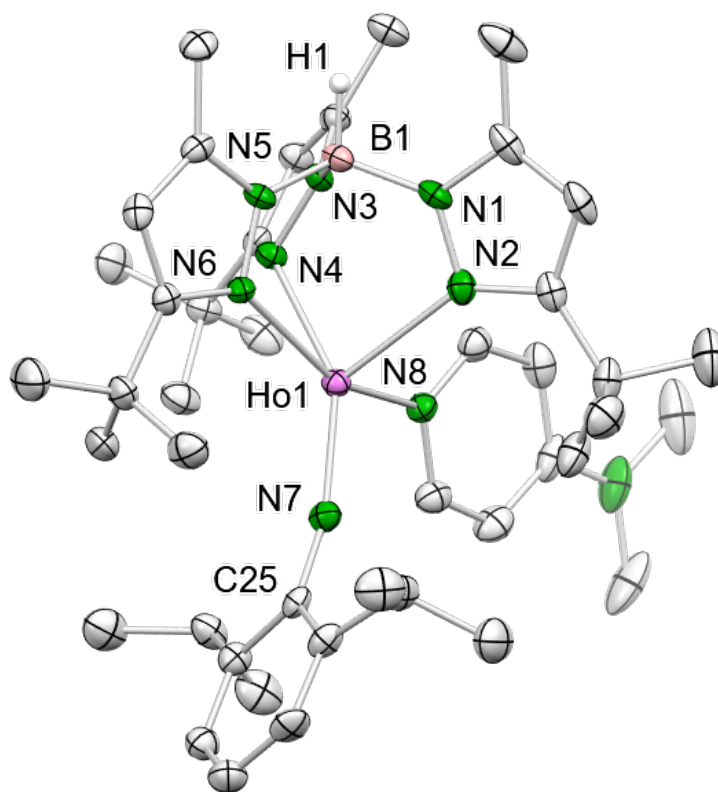

**Figure S9.** Crystal structure of **4-Ho**. Hydrogen atoms except for the B–H, and one additional toluene molecule are omitted for clarity. Atomic displacement ellipsoids were set at 50% probability. Selected interatomic distances [Å] and angles [°]: Ho1–N2 2.426(4), Ho1–N4 2.492(4), Ho1–N6 2.436(3), Ho1–N7 2.012(4), Ho1–N8 2.429(4); N2–Ho1–N4 93.34(12), N2–Ho1–N6 84.01(12), N2–Ho1–N7 120.38(13), N2–Ho1–N8 89.92(12), N4–Ho1–N6 74.40(12), N4–Ho1–N7 146.25(13), N4–Ho1–N8 79.83(12), N6–Ho1–N7 108.14(13), N6–Ho1–N8 153.09(12), N7–Ho1–N8 97.56(13), Ho1–N7–C25 166.7(3).



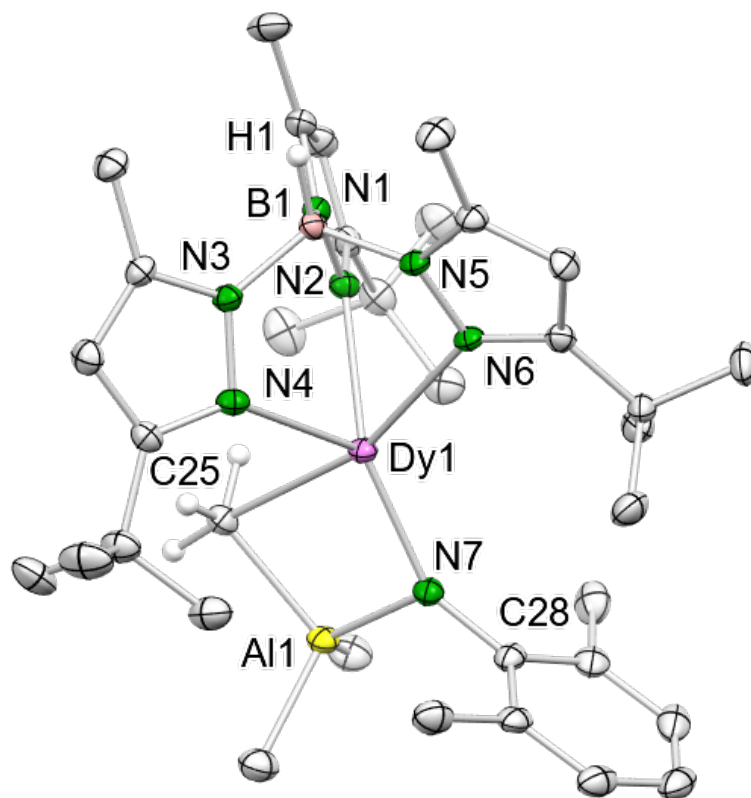

**Figure S10.** Crystal structure of **5-Dy**. Atomic displacement ellipsoids were set at 50% probability. Hydrogen atoms except for the B–H, and one additional toluene molecule are omitted for clarity. Selected interatomic distances [Å] and angles [°]: Dy1–N2 2.466(2), Dy1–N4 2.492(2), Dy1–N6 2.423(2), Dy1–N7 2.129(2), Dy1–C25 2.549(3), Al1–C25 2.091(3); N2–Dy1–N4 89.39(7), N2–Dy1–N6 74.80(7), N2–Dy1–N7 137.44(7), N2–Dy1–C25 90.18(8), N4–Dy1–N6 83.91(7), N4–Dy1–N7 131.58(7), N4–Dy1–C25 88.06(8), N6–Dy1–N7 114.82(8), N6–Dy1–C25 163.00(8), N7–Dy1–C25 81.61(8), Dy1–N7–C28 146.68(17).

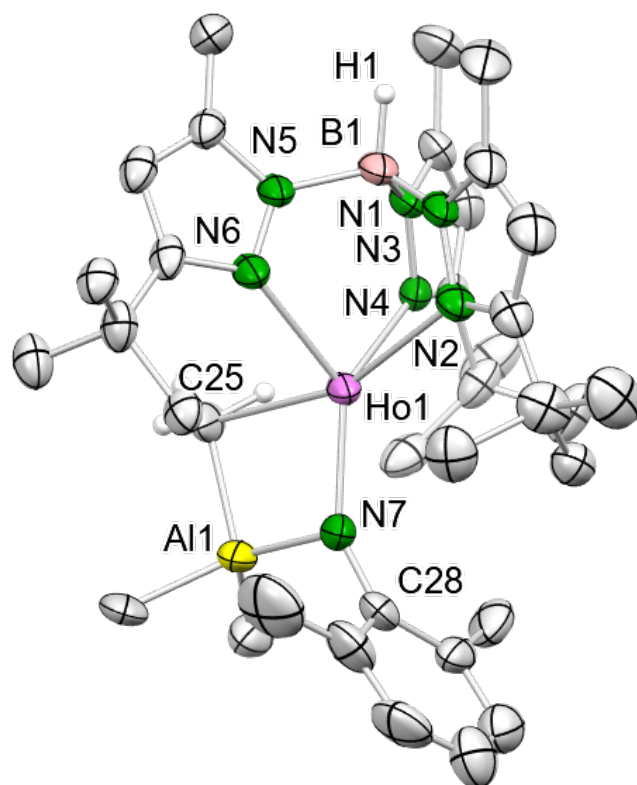

**Figure S11.** Crystal structure of **5-Ho**. Atomic displacement ellipsoids were set at 50% probability. Hydrogen atoms except for the B–H, the disorder of the *tert*-butyl groups and of the methyl groups of the trimethylaluminum are omitted for clarity. Selected interatomic distances [Å] and angles [°]: Ho1–N2 2.407(4), Ho1–N4 2.437(4), Ho1–N6 2.416(4), Ho1–N7 2.116(4), Ho1–C25 2.549(5), Al1–C25 2.105(6); N2–Ho1–N4 76.98(14), N2–Ho1–N6 77.74(15), N2–Ho1–N7 118.39(17), N2–Ho1–C25 159.64(16), N4–Ho1–N6 98.00(15), N4–Ho1–N7 132.41(16), N4–Ho1–C25 91.63(17), N6–Ho1–N7 128.39(16), N6–Ho1–C25 87.38(17), N7–Ho1–C25 81.76(17), Ho1–N7–C28 146.7(4).

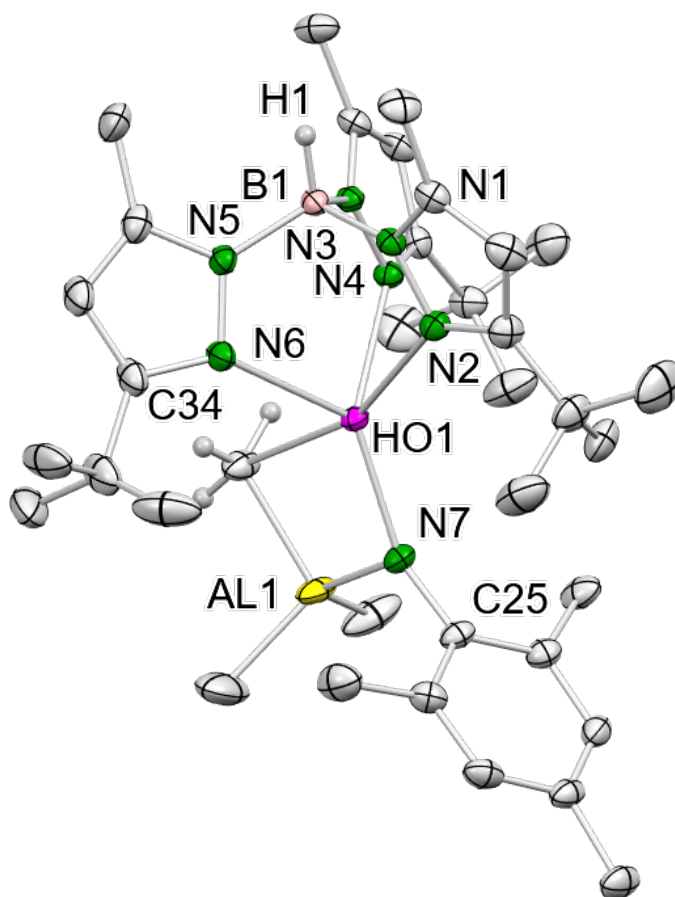

**Figure S12.** Crystal structure of **6-Ho**. Atomic displacement ellipsoids were set at 50% probability. Hydrogen atoms except for the B–H, and C34–H, one additional toluene molecule, and the disorder of the *tert*-butyl groups are omitted for clarity. Selected interatomic distances [Å] and angles [°]: Ho1–N2 2.394(3), Ho1–N4 2.436(3), Ho1–N6 2.454(3), Ho1–N7 2.116(3), Ho1–C34 2.554(3), Al1–C34 2.106(4); N2–Ho1–N4 76.67(9), N2–Ho1–N6 80.27(9), N2–Ho1–N7 116.96(10), N2–Ho1–C34 160.51(12), N4–Ho1–N6 95.45(9), N4–Ho1–N7 133.51(10), N4–Ho1–C34 89.54(11), N6–Ho1–N7 129.59(11), N6–Ho1–C34 87.52(13), N7–Ho1–C34 82.53(12), Ho1–N7–C25 151.0(2).

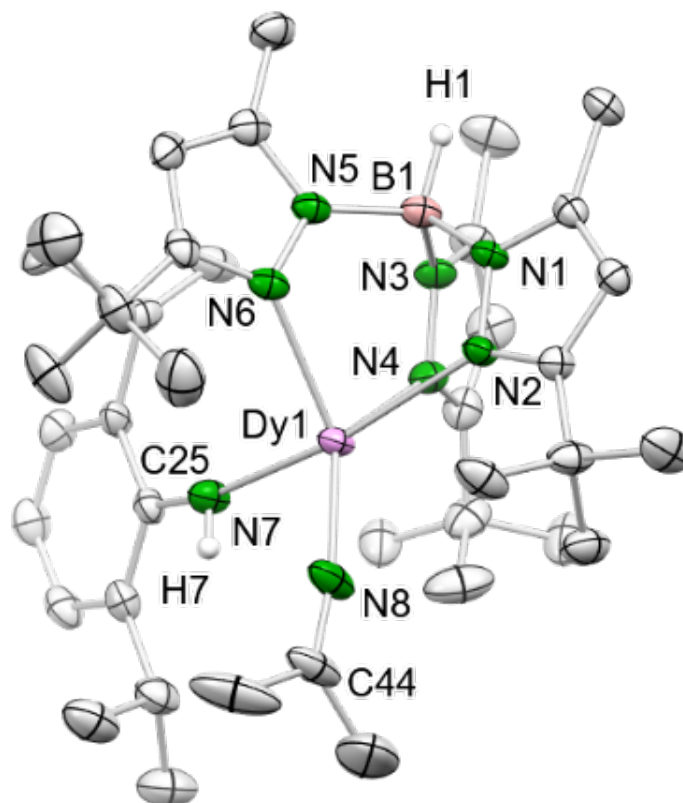

**Figure S13.** Crystal structure of **7-Dy**. Atomic displacement ellipsoids were set at 50% probability. Hydrogen atoms except for the B–H, and N–H are omitted for clarity. Selected interatomic distances [Å] and angles [°]: Dy1–N2 2.487(3), Dy1–N4 2.414(3), Dy1–N6 2.396(3), Dy1–N7 2.219(3), Dy1–N8 2.148(3); N2–Dy1–N4 75.05(10), N2–Dy1–N6 75.43(10), N2–Dy1–N7 167.88(11), N2–Dy1–N8 103.62(11), N4–Dy1–N6 95.88(10), N4–Dy1–N7 94.91(12), N4–Dy1–N8 136.15(12), N6–Dy1–N7 99.31(12), N6–Dy1–N8 126.77(12), N7–Dy1–N8 88.30(12), Dy1–N7–C25 156.3(3), Dy1–N8–C44 165.3(3).

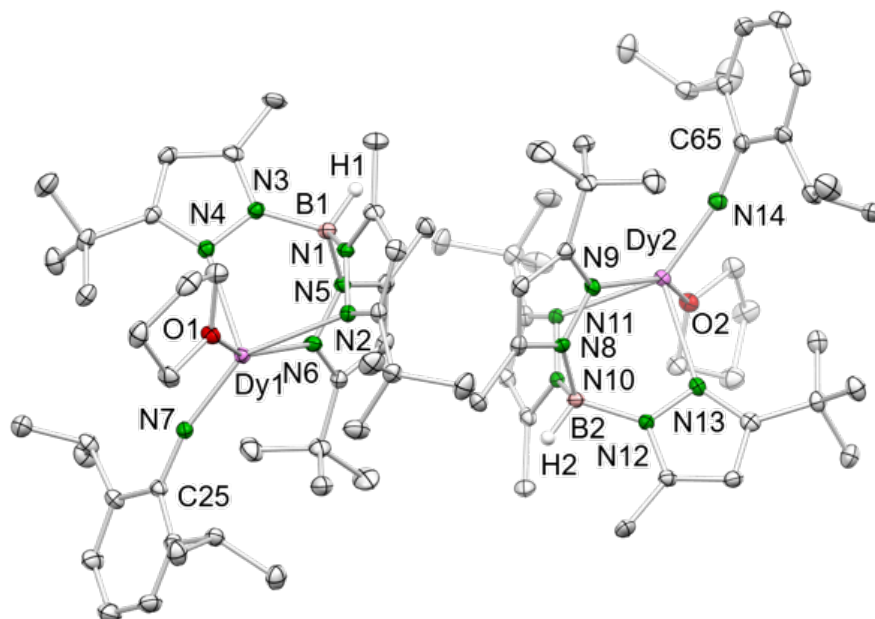

**Figure S14.** Crystal structure of **8-Dy**. Atomic displacement ellipsoids were set at 50% probability. Hydrogen atoms except for the B–H, and one additional THF molecule are omitted for clarity. The unit cell contains two independent molecules with different parameters. Selected interatomic distances [Å] and angles [°]: Dy1–N2 2.539(4), Dy1–N4 2.450(3), Dy1–N6 2.458(4), Dy1–N7 2.008(3), Dy1–O1 2.397(3), Dy2–N9 2.465(4), Dy2–N11 2.510(4), Dy2–N13 2.472(3), Dy2–N14 2.004(4), Dy2–O2 2.392(3); N2–Dy1–N4 92.82(12), N2–Dy1–N6 72.98(12), N2–Dy1–N7 149.01(13), N2–Dy1–O1 81.63(11), N4–Dy1–N6 82.59(12), N4–Dy1–N7 118.07(13), N4–Dy1–O1 91.16(11), N6–Dy1–N7 106.67(14), N6–Dy1–O1 153.45(11), N7–Dy1–O1 99.07(13), Dy1–N7–C25 166.9(3), N9–Dy2–N11 73.58(12), N9–Dy2–N13 83.99(11), N9–Dy2–N14 106.64(14), N9–Dy2–O2 151.86(11), N11–Dy2–N13 93.37(11), N11–Dy2–N14 144.82(14), N11–Dy2–O2 79.59(10), N13–Dy2–N14 121.80(14), N13–Dy2–O2 89.36(11), N14–Dy2–O2 100.11(13), Dy2–N14–C65 165.3(3).

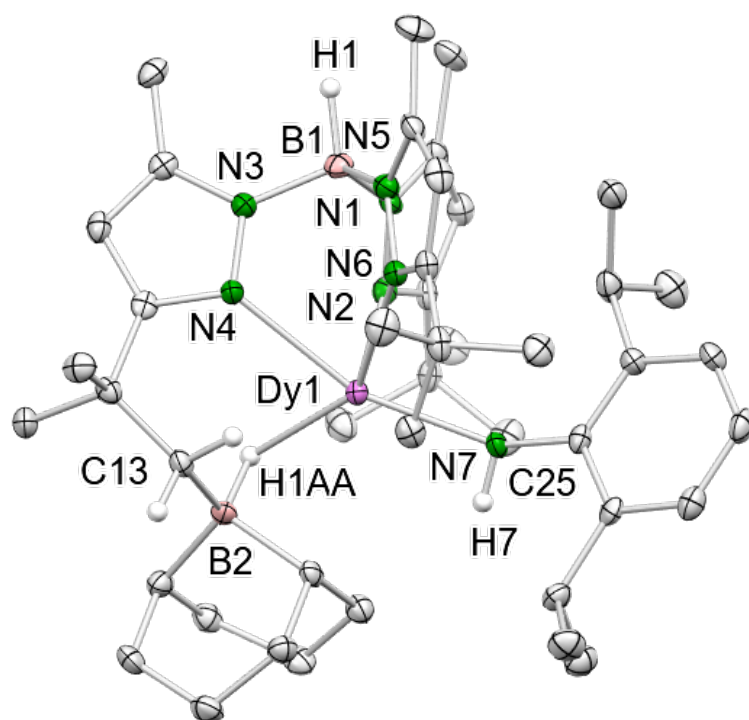

**Figure S15.** Solid-state structure of **9-Dy**. Atomic displacement ellipsoids were set at 50% probability. Hydrogen atoms except for the B–H, CH<sub>2</sub> and N–H are omitted for clarity. Selected interatomic distances [Å] and angles [°]: Dy1–N2 2.452(3), Dy1–N4 2.405(3), Dy1–N6 2.461(3), Dy1–N7 2.237(3), Dy1–H1AA 2.17(3), B2–C13 1.658(5); N2–Dy1–N4 79.55(9), N2–Dy1–N6 90.63(9), N2–Dy1–N7 93.18(10), N2–Dy1–H1AA 90.3(8), N4–Dy1–N6 70.77(9), N4–Dy1–N7 161.07(10), N4–Dy1–H1AA 75.5(8), N6–Dy1–N7 92.04(10), N6–Dy1–H1AA 145.4(8), N7–Dy1–H1AA 122.4(8), Dy1–N7–C25 143.4(2), Dy1–H1AA–B2 101.98.

**Table S1.** Crystallographic data for compounds **1-Ho**, **2-Dy**, and **2-Ho**

|                                                                | <b>1-Ho</b>                                                                            | <b>2-Dy</b>                                        | <b>2-Ho</b>                                                                      |
|----------------------------------------------------------------|----------------------------------------------------------------------------------------|----------------------------------------------------|----------------------------------------------------------------------------------|
| formula                                                        | C <sub>29</sub> H <sub>55</sub> GaBN <sub>6</sub> Ho·1.5 C <sub>7</sub> H <sub>8</sub> | C <sub>37</sub> H <sub>61</sub> BN <sub>7</sub> Dy | C <sub>37</sub> H <sub>61</sub> BN <sub>7</sub> Ho·C <sub>7</sub> H <sub>8</sub> |
| CCDC                                                           | 2312222                                                                                | 2312224                                            | 2312220                                                                          |
| M <sub>r</sub> [g mol <sup>-1</sup> ]                          | 871.45                                                                                 | 777.23                                             | 871.80                                                                           |
| color                                                          | colorless                                                                              | colorless                                          | colorless                                                                        |
| crystal dimensions [mm <sup>3</sup> ]                          | 0.557 x 0.340 x 0.082                                                                  | 0.198 x 0.117 x 0.091                              | 0.214 x 0.176 x 0.089                                                            |
| cryst syst                                                     | triclinic                                                                              | monoclinic                                         | triclinic                                                                        |
| space group                                                    | <i>P</i> $\bar{1}$                                                                     | <i>P</i> 2 <sub>1</sub> / <i>c</i>                 | <i>P</i> $\bar{1}$                                                               |
| <i>a</i> [Å]                                                   | 9.8291(10)                                                                             | 11.6084(10)                                        | 10.767(5)                                                                        |
| <i>b</i> [Å]                                                   | 13.4472(12)                                                                            | 18.3503(15)                                        | 12.621(6)                                                                        |
| <i>c</i> [Å]                                                   | 18.5931(17)                                                                            | 18.8307(15)                                        | 17.188(9)                                                                        |
| $\alpha$ [°]                                                   | 96.149(2)                                                                              | 90                                                 | 77.029(13)                                                                       |
| $\beta$ [°]                                                    | 100.699(2)                                                                             | 98.396(2)                                          | 81.681(16)                                                                       |
| $\gamma$ [°]                                                   | 110.456(2)                                                                             | 90                                                 | 88.061(9)                                                                        |
| <i>V</i> [Å <sup>3</sup> ]                                     | 2222.7(4)                                                                              | 3968.3(6)                                          | 2252.1(19)                                                                       |
| <i>Z</i>                                                       | 2                                                                                      | 4                                                  | 2                                                                                |
| <i>T</i> [K]                                                   | 100(2)                                                                                 | 100(2)                                             | 173(2)                                                                           |
| $\rho^{\text{calcd}}$ [g cm <sup>-3</sup> ]                    | 1.302                                                                                  | 1.301                                              | 1.286                                                                            |
| $\mu$ [mm <sup>-1</sup> ]                                      | 2.404                                                                                  | 1.916                                              | 1.793                                                                            |
| F (000)                                                        | 898                                                                                    | 1612                                               | 908                                                                              |
| $\theta$ range [°]                                             | 1.645/30.507                                                                           | 1.558/30.507                                       | 1.228/28.699                                                                     |
| unique reflns                                                  | 74018                                                                                  | 107390                                             | 59343                                                                            |
| observed reflns                                                | 13452                                                                                  | 12124                                              | 11646                                                                            |
| R <sub>1</sub> /wR <sub>2</sub> (I>2 $\sigma$ ) <sup>[b]</sup> | 0.0469/0.1284                                                                          | 0.0279/0.0623                                      | 0.0344/0.0907                                                                    |
| R <sub>1</sub> /wR <sub>2</sub> (all data) <sup>[b]</sup>      | 0.0601/0.1370                                                                          | 0.0368/0.0667                                      | 0.0371/0.0925                                                                    |
| GOF <sup>[a]</sup>                                             | 1.090                                                                                  | 1.052                                              | 1.057                                                                            |

<sup>[a]</sup>GOF =  $[\sum w(F_o^2 - F_c^2)^2 / (n_o - n_p)]^{1/2}$ . <sup>[b]</sup>R<sub>1</sub> =  $\sum (||F_o| - |F_c||) / \sum |F_o|$ , F<sub>o</sub> > 4 $\sigma$ (F<sub>o</sub>). <sup>[c]</sup>wR<sub>2</sub> =  $\{\sum [w(F_o^2 - F_c^2)^2] / \sum [w(F_o^2)^2]\}^{1/2}$ .

**Table S2.** Crystallographic data for compounds **4-Y**, **4-Dy**, and **4-Ho**

|                                                                | <b>4-Y*</b>                                                                         | <b>4-Dy</b>                                                                          | <b>4-Ho</b>                                                                          |
|----------------------------------------------------------------|-------------------------------------------------------------------------------------|--------------------------------------------------------------------------------------|--------------------------------------------------------------------------------------|
| formula                                                        | C <sub>43</sub> H <sub>67</sub> BN <sub>9</sub> Y·3 C <sub>4</sub> H <sub>8</sub> O | C <sub>43</sub> H <sub>67</sub> BN <sub>9</sub> Dy·1/2 C <sub>7</sub> H <sub>8</sub> | C <sub>43</sub> H <sub>67</sub> BN <sub>9</sub> Ho·1/2 C <sub>7</sub> H <sub>8</sub> |
| CCDC                                                           | 2312214                                                                             | 2312225                                                                              | 2312219                                                                              |
| M <sub>r</sub> [g mol <sup>-1</sup> ]                          | 1026.08                                                                             | 929.43                                                                               | 931.86                                                                               |
| color                                                          | colourless                                                                          | light yellow                                                                         | yellow                                                                               |
| crystal dimensions [mm <sup>3</sup> ]                          | 0.267 x 0.176 x 0.072                                                               | 0.145 x 0.081 x 0.056                                                                | 0.107 x 0.105 x 0.054                                                                |
| cryst syst                                                     | monoclinic                                                                          | monoclinic                                                                           | monoclinic                                                                           |
| space group                                                    | <i>P2<sub>1</sub></i>                                                               | <i>C2/c</i>                                                                          | <i>C2/c</i>                                                                          |
| <i>a</i> [Å]                                                   | 11.4785(19)                                                                         | 41.940(3)                                                                            | 41.814(2)                                                                            |
| <i>b</i> [Å]                                                   | 17.511(3)                                                                           | 11.5627(7)                                                                           | 11.5565(6)                                                                           |
| <i>c</i> [Å]                                                   | 14.619(2)                                                                           | 19.9969(12)                                                                          | 20.0524(10)                                                                          |
| $\alpha$ [°]                                                   | 90                                                                                  | 90                                                                                   | 90                                                                                   |
| $\beta$ [°]                                                    | 105.928(4)                                                                          | 102.8940(10)                                                                         | 102.683(2)                                                                           |
| $\gamma$ [°]                                                   | 90                                                                                  | 90                                                                                   | 90                                                                                   |
| <i>V</i> [Å <sup>3</sup> ]                                     | 2825.5(8)                                                                           | 9452.7(10)                                                                           | 9453.4(8)                                                                            |
| <i>Z</i>                                                       | 2                                                                                   | 8                                                                                    | 8                                                                                    |
| <i>T</i> [K]                                                   | 100(2)                                                                              | 100(2)                                                                               | 100(2)                                                                               |
| $\rho_{\text{calcd}}$ [g cm <sup>-3</sup> ]                    | 1.206                                                                               | 1.306                                                                                | 1.309                                                                                |
| $\mu$ [mm <sup>-1</sup> ]                                      | 1.081                                                                               | 1.622                                                                                | 1.715                                                                                |
| F (000)                                                        | 1104                                                                                | 3872                                                                                 | 3880                                                                                 |
| $\theta$ range [°]                                             | 1.449/ 22.520                                                                       | 1.830/28.720                                                                         | 1.832/28.508                                                                         |
| unique reflns                                                  | 34654                                                                               | 75914                                                                                | 68042                                                                                |
| observed reflns                                                | 7276                                                                                | 12234                                                                                | 11080                                                                                |
| R <sub>1</sub> /wR <sub>2</sub> (I>2 $\sigma$ ) <sup>[b]</sup> |                                                                                     | 0.0385/0.0773                                                                        | 0.0519/0.0805                                                                        |
| R <sub>1</sub> /wR <sub>2</sub> (all data) <sup>[b]</sup>      |                                                                                     | 0.0629/0.0870                                                                        | 0.1002/0.0939                                                                        |
| GOF <sup>[a]</sup>                                             | 1.110                                                                               | 1.022                                                                                | 1.013                                                                                |

<sup>[a]</sup>GOF =  $[\sum w(F_o^2 - F_c^2)^2 / (n_o - n_p)]^{1/2}$ . <sup>[b]</sup>R<sub>1</sub> =  $\Sigma(|F_o| - |F_c|) / \Sigma|F_o|$ , F<sub>o</sub> > 4 $\sigma$ (F<sub>o</sub>), wR<sub>2</sub> =  $\{\Sigma[w(F_o^2 - F_c^2)^2 / \Sigma[w(F_o^2)^2]]\}^{1/2}$ .

\* Connectivity only.



**Table S3.** Crystallographic data for compounds **5-Dy**, **5-Ho** and **6-Ho**

|                                                                  | <b>5-Dy</b>                                                                                                                                | <b>5-Ho</b>                                          | <b>6-Ho</b>                                                                          |
|------------------------------------------------------------------|--------------------------------------------------------------------------------------------------------------------------------------------|------------------------------------------------------|--------------------------------------------------------------------------------------|
| formula                                                          | C <sub>35</sub> H <sub>58</sub> B <sub>2</sub> N <sub>7</sub> DyAl <sub>0.86</sub> /Ga <sub>0.14</sub> · 1/2 C <sub>7</sub> H <sub>8</sub> | C <sub>35</sub> H <sub>58</sub> BN <sub>7</sub> HoAl | C <sub>36</sub> H <sub>60</sub> BN <sub>7</sub> HoAl · C <sub>7</sub> H <sub>8</sub> |
| CCDC                                                             | 2312218                                                                                                                                    | 2312216                                              | 2312215                                                                              |
| M <sub>r</sub> [g mol <sup>-1</sup> ]                            | 829.43                                                                                                                                     | 779.60                                               | 885.76                                                                               |
| color                                                            | yellow                                                                                                                                     | colorless                                            | yellow                                                                               |
| crystal dimensions [mm <sup>3</sup> ]                            | 0.341 x 0.072 x 0.039                                                                                                                      | 0.315 x 0.067 x 0.028                                | 0.273 x 0.173 x 0.150                                                                |
| cryst syst                                                       | monoclinic                                                                                                                                 | triclinic                                            | monoclinic                                                                           |
| space group                                                      | <i>P2<sub>1</sub>/n</i>                                                                                                                    | <i>P</i> $\bar{1}$                                   | <i>Cc</i>                                                                            |
| <i>a</i> [Å]                                                     | 9.5640(11)                                                                                                                                 | 11.8446(8)                                           | 21.5531(9)                                                                           |
| <i>b</i> [Å]                                                     | 23.328(3)                                                                                                                                  | 12.0811(8)                                           | 11.2886(5)                                                                           |
| <i>c</i> [Å]                                                     | 18.369(2)                                                                                                                                  | 15.8693(11)                                          | 19.1515(8)                                                                           |
| $\alpha$ [°]                                                     | 90                                                                                                                                         | 81.388(2)                                            | 90                                                                                   |
| $\beta$ [°]                                                      | 100.874(2)                                                                                                                                 | 80.802(2)                                            | 108.0490(10)                                                                         |
| $\gamma$ [°]                                                     | 90                                                                                                                                         | 66.125(2)                                            | 90                                                                                   |
| <i>V</i> [Å <sup>3</sup> ]                                       | 4024.6(8)                                                                                                                                  | 2040.7(2)                                            | 4430.3(3)                                                                            |
| <i>Z</i>                                                         | 4                                                                                                                                          | 2                                                    | 4                                                                                    |
| <i>T</i> [K]                                                     | 173(2)                                                                                                                                     | 100(2)                                               | 100(2)                                                                               |
| $\rho^{\text{calcd}}$ [g cm <sup>-3</sup> ]                      | 1.369                                                                                                                                      | 1.269                                                | 1.328                                                                                |
| $\mu$ [mm <sup>-1</sup> ]                                        | 2.005                                                                                                                                      | 1.991                                                | 1.843                                                                                |
| F (000)                                                          | 1714                                                                                                                                       | 804                                                  | 1840                                                                                 |
| $\theta$ range [°]                                               | 2.079/30.550                                                                                                                               | 1.852/24.850                                         | 1.988/28.770                                                                         |
| unique reflns                                                    | 73807                                                                                                                                      | 43797                                                | 35460                                                                                |
| observed reflns                                                  | 12298                                                                                                                                      | 7013                                                 | 11130                                                                                |
| R <sub>1</sub> /wR <sub>2</sub> (I > 2 $\sigma$ ) <sup>[b]</sup> | 0.0334/0.0719                                                                                                                              | 0.0432/0.0908                                        | 0.0216/0.0429                                                                        |
| R <sub>1</sub> /wR <sub>2</sub> (all data) <sup>[b]</sup>        | 0.0462/0.0773                                                                                                                              | 0.0656/0.0992                                        | 0.0237/0.0438                                                                        |
| GOF <sup>[a]</sup>                                               | 1.042                                                                                                                                      | 1.046                                                | 1.015                                                                                |

<sup>[a]</sup>GOF =  $[\sum w(F_o^2 - F_c^2)^2 / (n_o - n_p)]^{1/2}$ . <sup>[b]</sup>R<sub>1</sub> =  $\sum(|F_o| - |F_c|) / \sum|F_o|$ , F<sub>o</sub> > 4 $\sigma$ (F<sub>o</sub>), wR<sub>2</sub> =  $[\sum[w(F_o^2 - F_c^2)^2] / \sum[w(F_o^2)^2]]^{1/2}$ .

**Table S4.** Crystallographic data for compounds **7-Dy**, **9-Dy** and **3-Ho**

|                                                                         | <b>7-Dy</b>                                                                          | <b>9-Dy</b>                                                      | <b>3-Ho</b>                                                                         |
|-------------------------------------------------------------------------|--------------------------------------------------------------------------------------|------------------------------------------------------------------|-------------------------------------------------------------------------------------|
| formula                                                                 | C <sub>42</sub> H <sub>64</sub> BN <sub>8</sub> Dy·3/2 C <sub>7</sub> H <sub>8</sub> | C <sub>44</sub> H <sub>72</sub> B <sub>2</sub> N <sub>7</sub> Dy | C <sub>44</sub> H <sub>72</sub> BN <sub>8</sub> Ho· C <sub>4</sub> H <sub>8</sub> O |
| CCDC                                                                    | 2312217                                                                              | 2312221                                                          | 2312223                                                                             |
| M <sub>r</sub> [g mol <sup>-1</sup> ]                                   | 956.49                                                                               | 883.20                                                           | 960.94                                                                              |
| color                                                                   | yellow                                                                               | colourless                                                       | colorless                                                                           |
| crystal dimensions [mm <sup>3</sup> ]                                   | 0.121 x 0.090 x 0.080                                                                | 0.141 x 0.141 x 0.064                                            | 0.184 x 0.128 x 0.064                                                               |
| cryst syst                                                              | monoclinic                                                                           | monoclinic                                                       | triclinic                                                                           |
| space group                                                             | <i>P2<sub>1</sub>/n</i>                                                              | <i>C2/c</i>                                                      | <i>P</i> $\bar{1}$                                                                  |
| <i>a</i> [Å]                                                            | 12.1758(12)                                                                          | 42.723(6)                                                        | 10.851(2)                                                                           |
| <i>b</i> [Å]                                                            | 17.8931(17)                                                                          | 10.3005(13)                                                      | 20.269(4)                                                                           |
| <i>c</i> [Å]                                                            | 23.260(2)                                                                            | 21.324(2)                                                        | 22.192(5)                                                                           |
| $\alpha$ [°]                                                            | 90                                                                                   | 90                                                               | 96.949(3)                                                                           |
| $\beta$ [°]                                                             | 96.643(2)                                                                            | 90.449(2)                                                        | 96.699(3)                                                                           |
| $\gamma$ [°]                                                            | 90                                                                                   | 90                                                               | 100.067(3)                                                                          |
| <i>V</i> [Å <sup>3</sup> ]                                              | 5033.5(8)                                                                            | 9384(2)                                                          | 4722.7(17)                                                                          |
| <i>Z</i>                                                                | 4                                                                                    | 8                                                                | 4                                                                                   |
| <i>T</i> [K]                                                            | 100(2)                                                                               | 100(2)                                                           | 100(2)                                                                              |
| $\rho^{\text{calcd}}$ [g cm <sup>-3</sup> ]                             | 1.262                                                                                | 1.250                                                            | 1.351                                                                               |
| $\mu$ [mm <sup>-1</sup> ]                                               | 1.524                                                                                | 1.628                                                            | 1.719                                                                               |
| F (000)                                                                 | 2000                                                                                 | 3688                                                             | 2016                                                                                |
| $\theta$ range [°]                                                      | 1.439/28.700                                                                         | 1.907/ 27.128                                                    | 1.287/27.157                                                                        |
| unique reflns                                                           | 59881                                                                                | 49937                                                            | 99190                                                                               |
| observed reflns                                                         | 12905                                                                                | 10376                                                            | 20871                                                                               |
| R <sub>1</sub> /wR <sub>2</sub> ( <i>I</i> >2 $\sigma$ ) <sup>[b]</sup> | 0.0439/0.0888                                                                        | 0.0376/0.0806                                                    | 0.0412/0.0832                                                                       |
| R <sub>1</sub> /wR <sub>2</sub> (all data) <sup>[b]</sup>               | 0.0820/0.1048                                                                        | 0.0552/0.0888                                                    | 0.0703/0.0941                                                                       |
| GOF <sup>[a]</sup>                                                      | 1.018                                                                                | 1.022                                                            | 1.010                                                                               |

<sup>[a]</sup>GOF =  $[\sum w(F_o^2 - F_c^2)^2 / (n_o - n_p)]^{1/2}$ . <sup>[b]</sup>R<sub>1</sub> =  $\Sigma(|F_o| - |F_c|) / \Sigma|F_o|$ ,  $F_o > 4\sigma(F_o)$ , wR<sub>2</sub> =  $\{\Sigma[w(F_o^2 - F_c^2)^2] / \Sigma[w(F_o^2)^2]\}^{1/2}$ .

**Table S5.** Crystallographic data for compounds **8-Dy**, **Ho[Ga(CH<sub>3</sub>)<sub>4</sub>]<sub>3</sub>** and **Dy[Ga(CH<sub>3</sub>)<sub>4</sub>]<sub>3</sub>**

|                                                                | <b>8-Dy</b>                                                                             | <b>Ho[Ga(CH<sub>3</sub>)<sub>4</sub>]<sub>3</sub></b> | <b>Dy[Ga(CH<sub>3</sub>)<sub>4</sub>]<sub>3</sub></b> |
|----------------------------------------------------------------|-----------------------------------------------------------------------------------------|-------------------------------------------------------|-------------------------------------------------------|
| formula                                                        | C <sub>40</sub> H <sub>65</sub> BN <sub>7</sub> ODy·1/2 C <sub>4</sub> H <sub>8</sub> O | C <sub>12</sub> H <sub>36</sub> Ga <sub>3</sub> Ho    | C <sub>12</sub> H <sub>36</sub> Ga <sub>3</sub> Dy    |
| CCDC                                                           | 2312226                                                                                 | 2312212                                               | 2312213                                               |
| M <sub>r</sub> [g mol <sup>-1</sup> ]                          | 869.35                                                                                  | 554.50                                                | 552.07                                                |
| color                                                          | yellow                                                                                  | pink                                                  | colorless                                             |
| crystal dimensions [mm <sup>3</sup> ]                          | 0.241 x 0.137 x 0.107                                                                   | 0.60 x 0.40 x 0.30                                    | 0.348 x 0.180 x 0.174                                 |
| cryst syst                                                     | orthorhombic                                                                            | tetragonal                                            | monoclinic                                            |
| space group                                                    | <i>Pna2<sub>1</sub></i>                                                                 | <i>I4<sub>1</sub>/a</i>                               | <i>C2/c</i>                                           |
| <i>a</i> [Å]                                                   | 19.7303(9)                                                                              | 17.6111(4)                                            | 10.8711(6)                                            |
| <i>b</i> [Å]                                                   | 11.5097(5)                                                                              | 17.6111(4)                                            | 15.7025(9)                                            |
| <i>c</i> [Å]                                                   | 37.3911(18)                                                                             | 26.4443(6)                                            | 12.4891(7)                                            |
| $\alpha$ [°]                                                   | 90                                                                                      | 90                                                    | 90                                                    |
| $\beta$ [°]                                                    | 90                                                                                      | 90                                                    | 102.0700(10)                                          |
| $\gamma$ [°]                                                   | 90                                                                                      | 90                                                    | 90                                                    |
| <i>V</i> [Å <sup>3</sup> ]                                     | 8491.1(7)                                                                               | 8201.7(4)                                             | 2084.8(2)                                             |
| <i>Z</i>                                                       | 8                                                                                       | 16                                                    | 4                                                     |
| <i>T</i> [K]                                                   | 100(2)                                                                                  | 173(2)                                                | 100(2)                                                |
| $\rho_{\text{calcd}}$ [g cm <sup>-3</sup> ]                    | 1.360                                                                                   | 1.796                                                 | 1.759                                                 |
| $\mu$ [mm <sup>-1</sup> ]                                      | 1.801                                                                                   | 7.698                                                 | 7.360                                                 |
| F (000)                                                        | 3624                                                                                    | 4288                                                  | 1068                                                  |
| $\theta$ range [°]                                             | 1.089/30.487                                                                            | 4.834/ 29.234                                         | 3.078/ 29.144                                         |
| unique reflns                                                  | 219882                                                                                  | 76662                                                 | 16607                                                 |
| observed reflns                                                | 25876                                                                                   | 5511                                                  | 2800                                                  |
| R <sub>1</sub> /wR <sub>2</sub> (I>2 $\sigma$ ) <sup>[b]</sup> | 0.0316/0.0645                                                                           | 0.0404/0.0773                                         | 0.0189/0.0479                                         |
| R <sub>1</sub> /wR <sub>2</sub> (all data) <sup>[b]</sup>      | 0.0371/0.0669                                                                           | 0.0434/0.0782                                         | 0.0196/0.0483                                         |
| GOF <sup>[a]</sup>                                             | 1.040                                                                                   | 1.395                                                 | 1.065                                                 |

<sup>[a]</sup>GOF =  $[\sum w(F_0^2 - F_c^2)^2 / (n_0 - n_p)]^{1/2}$ . <sup>[b]</sup>R<sub>1</sub> =  $\Sigma(|F_0| - |F_c|) / \Sigma|F_0|$ , F<sub>0</sub> > 4 $\sigma$ (F<sub>0</sub>), wR<sub>2</sub> =  $\{\Sigma[w(F_0^2 - F_c^2)^2] / \Sigma[w(F_0^2)^2]\}^{1/2}$ .

**X-ray Crystallography and Crystal Structure Determinations.** Single crystals of the reported compounds **1-Ln** – **9-Ln** were grown by standard techniques from saturated solutions using toluene. Suitable crystals for X-ray structure analyses were selected in a glovebox and coated with Parabar 10312 (previously known as Paratone N, Hampton Research) and fixed on a nylon loop/glass fiber.

X-ray data for above mentioned compounds, except for **1-Ho<sup>Ga</sup>** and  $\text{Ho}(\text{Ga}(\text{CH}_3)_4)_3$ , were collected on a Bruker APEX II DUO (all remaining; instruments equipped with an  $\text{I}\mu\text{S}$  microfocus sealed tube and QUAZAR optics for  $\text{MoK}\alpha$  ( $\lambda = 0.71073 \text{ \AA}$ ) and  $\text{CuK}\alpha$  ( $\lambda = 1.54184 \text{ \AA}$ ) radiation. **1-Ho<sup>Ga</sup>** was measured on a Bruker SMART APEX II instrument equipped with a fine focus sealed tube and TRIUMPH monochromator using  $\text{MoK}\alpha$  radiation ( $\lambda = 0.71073 \text{ \AA}$ ). The data collection strategy was determined using COSMO<sup>4</sup> employing  $\omega$ -scans. Raw data were processed using APEX II/III<sup>5</sup> and SAINT,<sup>6</sup> corrections for absorption effects were applied using SADABS.<sup>7</sup> Data for  $\text{Ho}(\text{Ga}(\text{CH}_3)_4)_3$  were collected at 173(2) K on a STOE IPDS II system, equipped with a fine focus sealed tube and graphite monochromator using  $\text{MoK}\alpha$  radiation ( $\lambda = 0.71073 \text{ \AA}$ ) performing  $\phi$ -scans. Raw data were collected and integrated using Stoe's X-Area<sup>[8]</sup> software package. Absorption correction has been done using X-Red<sup>[9]</sup> and X-Shape<sup>[10]</sup>. The structures were solved by direct methods and refined against all data by full-matrix least-squares methods on  $F^2$  using ShelXl<sup>11</sup> and ShelXle.<sup>12</sup> All graphics were produced employing ORTEP-3<sup>13</sup> and POV-Ray.<sup>14</sup> Further details of the refinement and crystallographic data are listed in Table S1-S5, and in the CIF files. CCDC depositions 2312212-2312226 contain all the supplementary crystallographic data for this paper. These data can be obtained free of charge from The Cambridge Crystallographic Data Centre via [www.ccdc.cam.ac.uk/structures/](http://www.ccdc.cam.ac.uk/structures/).

## DRIFT Spectroscopy

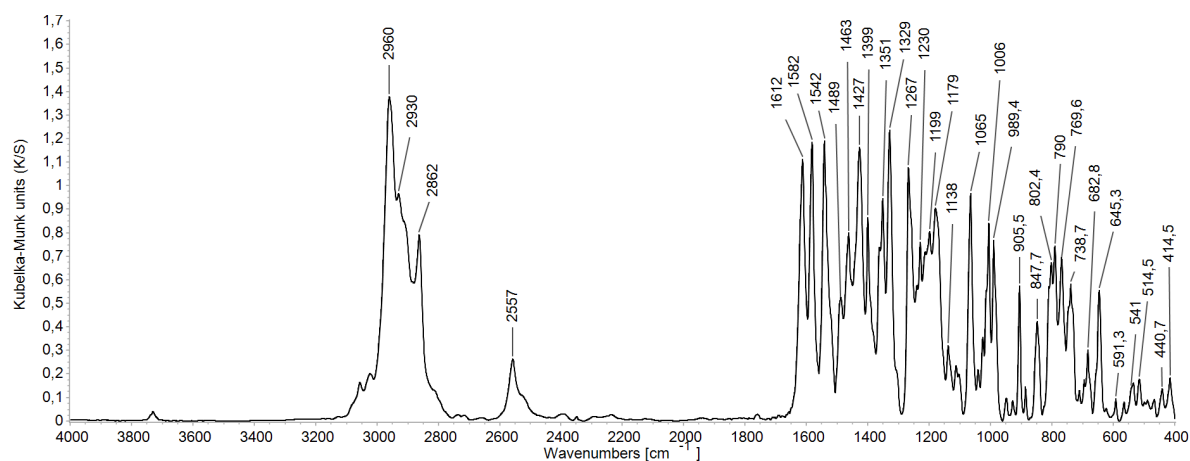

Figure S16. DRIFT spectrum (KBr) of compound 4-Dy at 26 °C.

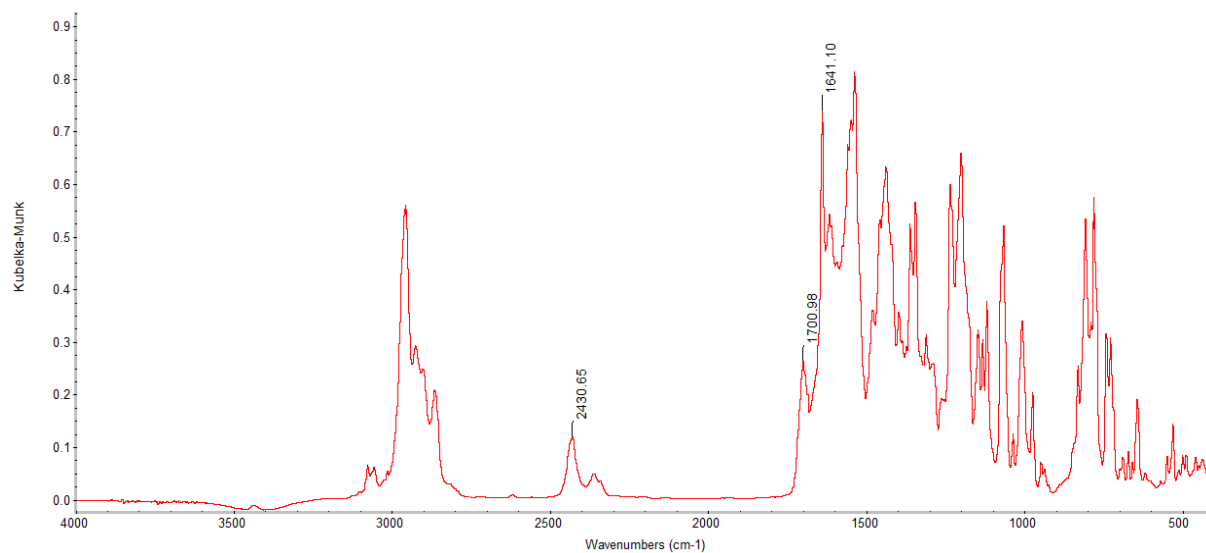

Figure S17. DRIFT spectrum (KBr) of compound 10-Dy at 26 °C.

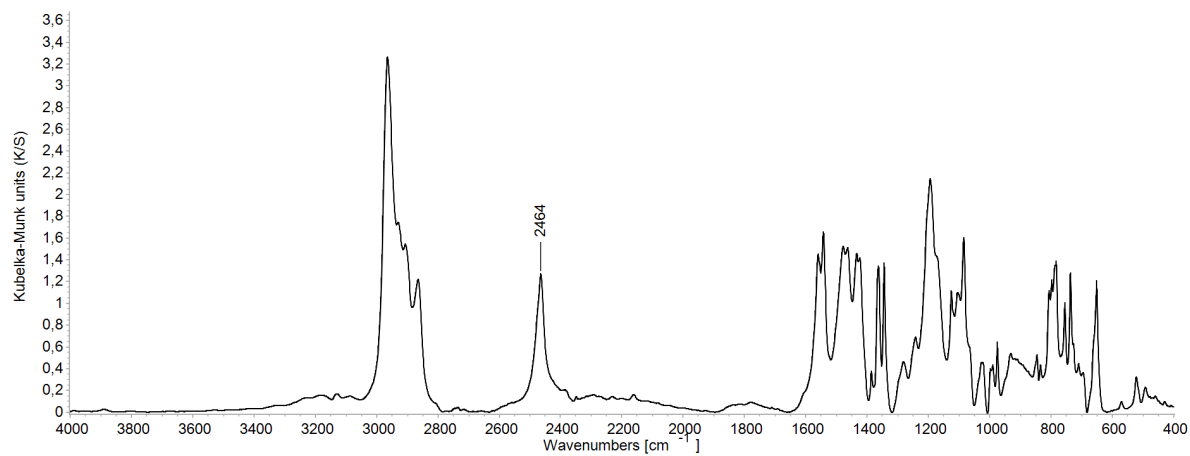

Figure S18. DRIFT spectrum (KBr) of compound of HTP<sup>*b*Bu,Me</sup> at 25 °C.

## NMR spectroscopy

### Notes on NMR spectroscopic characterizations.

Due to the paramagnetic nature of Dy(III) and Ho(III) any conclusive interpretation of the recorded NMR spectra was not possible. In general, solvent peaks are marked with an asterisk (\*).

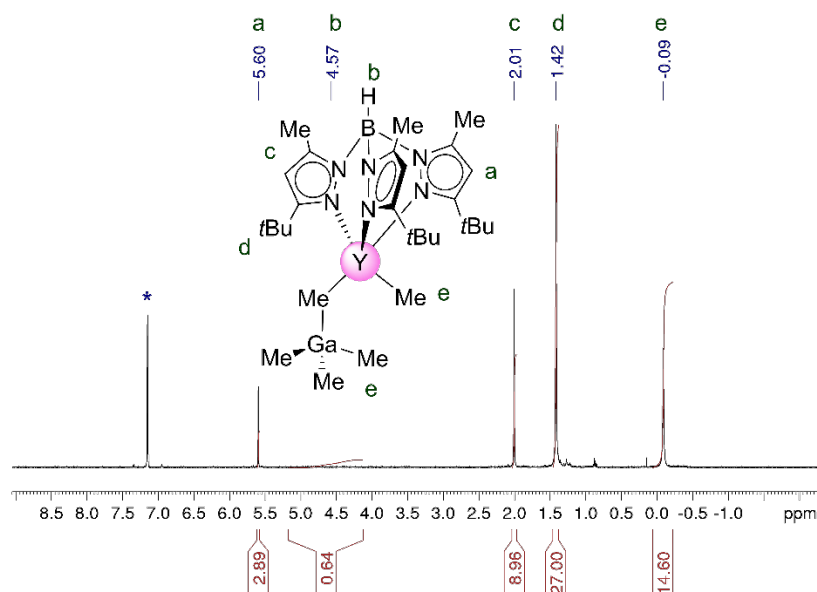

Figure S19. <sup>1</sup>H NMR spectrum (400 MHz) of compound 1-Y<sup>Ga</sup> in C<sub>6</sub>D<sub>6</sub> at 26 °C.

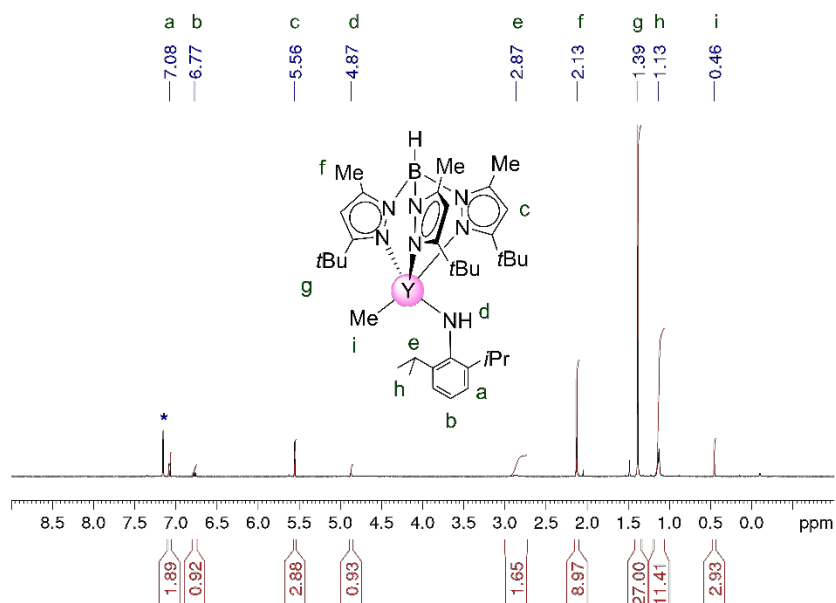

Figure S20. <sup>1</sup>H NMR spectrum (400 MHz) of compound 2-Y in C<sub>6</sub>D<sub>6</sub> at 26 °C.

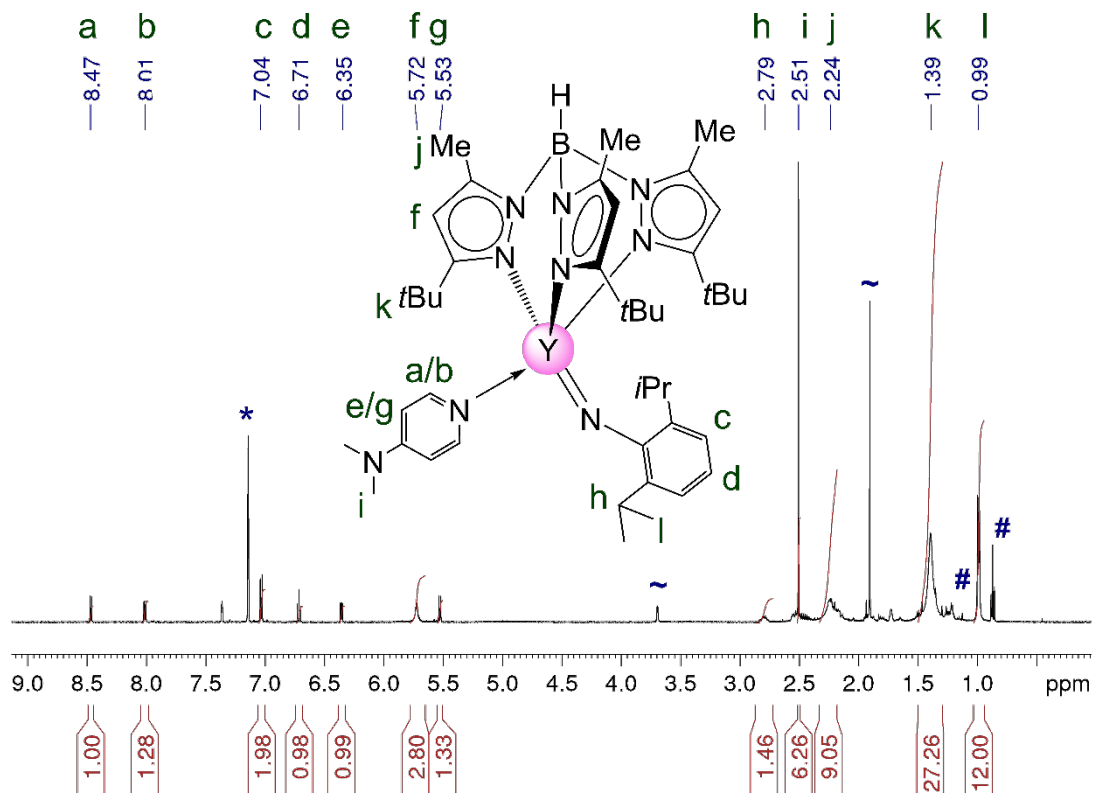

**Figure S21.** <sup>1</sup>H NMR spectrum (500 MHz) of compound 4-Y in C<sub>6</sub>D<sub>6</sub> at 26 °C.

## References

- [1] J. L. Kisko, T. Hascall, C. Kimblin and G. Parkin, *J. Chem. Soc., Dalton Trans.*, 1999, 1929-1936.
- [2] M. Zimmermann, N. Å. Frøystein, A. Fischbach, P. Sirsch, H. M. Dietrich, K. W. Törnroos, E. Herdtweck and R. Anwander, *Chem. Eur. J.*, 2007, **13**, 8784-8800.
- [3] W. J. Evans, R. Anwander, R. J. Doedens and J. W. Ziller, *Angew. Chem. Int. Ed. Engl.*, 1994, **33**, 1641-1644.
- [4] COSMO, v. 1.61; Bruker AXS Inc.: Madison, WI, 2012.
- [5] APEX 3 V. 2019.11-0, Bruker AXS Inc., Madison, WI, 2019.  
APEX 2 V. 2012.10\_0, Bruker AXS Inc., Madison, WI, 2012.
- [6] SAINT V. 8.38A, Bruker AXS Inc., Madison, WI, 2017.  
SAINT V. 8.40B, Bruker Nano, Inc., Madison, WI, 2019.
- [7] SADABS: L. Krause, R. Herbst-Irmer, G. M. Sheldrick and D. Stalke, *J. Appl. Crystallogr.* 2015, **48**, 3.
- [8] X-Area v. 1.55, Stoe & Cie GmbH, Darmstadt, Germany, 2009.
- [9] X-Red 32 v. 1.53, Stoe & Cie GmbH, Darmstadt, Germany, 2009.
- [10] X-Shape v.2.12.2, Stoe & Cie GmbH, Darmstadt, Germany, 2009.
- [11] ShelXL: Sheldrick, G. M., Crystal structure refinement with SHELXL, *Acta Cryst.* **2015**, C71, 3-8
- [12] ShelXle: C. B. Hübschle, G. M. Sheldrick and B. Dittrich, *J. Appl. Crystallogr.* 2011, **44**, 1281-1284.
- [13] L. J. Farrugia, *J. Appl. Crystallogr.* 1997, **30**, 565-566.
- [14] POV-Ray v. 3.6; Persistence of Vision Pty. Ltd.: Williamstown, Victoria, Australia, 2004.  
<http://www.povray.org/> .
